1 **Functional characterization of human Homeodomain-interacting protein kinases (HIPKs)**  
2 **in *Drosophila melanogaster* reveal both conserved functions and differential induction of**  
3 **HOX gene expression**

4  
5 **Short Title: Expression of human HIPKs in *Drosophila* reveals novel and conserved**  
6 **functions**

7  
8 Stephen D. Kinsey, Gerald A. Shipman and Esther M. Verheyen<sup>1</sup>

9 Department of Molecular Biology and Biochemistry,

10 Centre for Cell Biology, Development and Disease,

11 Simon Fraser University, Burnaby, B.C., Canada

12 <sup>1</sup> Corresponding author, [everheye@sfu.ca](mailto:everheye@sfu.ca)

13

## 14 **Abstract**

15 Homeodomain-interacting protein kinases (Hipks) are a family of conserved proteins that are  
16 necessary for development in both invertebrate and vertebrate organisms. Vertebrates have four  
17 paralogues, Hipks 1-4. Mice lacking *Hipk1* or *Hipk2* are viable, however loss of both is lethal  
18 during early embryonic development, with embryos exhibiting homeotic skeletal transformations  
19 and incorrect HOX gene expression. While these results suggest Hipks have a role in regulating  
20 HOX genes, a regulatory mechanism has not been characterized, and further comparisons of the  
21 roles of Hipks in development has not progressed. One challenge with characterizing  
22 developmental regulators in vertebrates is the extensive redundancy of genes. For this reason, we  
23 used *Drosophila melanogaster*, which has reduced genetic redundancy, to study the functions of  
24 the four human HIPKs (hHIPKs). In *D. melanogaster*, zygotic loss of the single ortholog *dhipk*  
25 results in lethality with distinct eye and head defects. We used a *dhipk* mutant background to  
26 compare the ability of each hHIPK protein to rescue the phenotypes caused by the loss of dHipk.  
27 In these humanized flies, both hHIPK1 and hHIPK2 rescued lethality, while hHIPK3 and  
28 hHIPK4 only rescued minor *dhipk* mutant patterning phenotypes. This evidence for conserved  
29 functions of hHIPKs in *D. melanogaster* directed our efforts to identify and compare the  
30 developmental potential of hHIPKs by expressing them in well-defined tissue domains and  
31 monitoring changes in phenotypes. We observed unique patterns of homeotic transformations in  
32 flies expressing hHIPK1, hHIPK2, or hHIPK3 caused by ectopic induction of Hox proteins.  
33 These results were indicative of inhibited Polycomb-group complex (PcG) components,  
34 suggesting that hHIPKs play a role in regulating its activity. Furthermore, knockdown of PcG  
35 components phenocopied hHIPK and dHipk expression phenotypes. Together, this data shows

36 that hHIPKs function in *D. melanogaster*, where they appear to have variable ability to inhibit  
37 PcG, which may reflect their roles in development.

### 38 **Author summary**

39 The redundancy of vertebrate genes often makes identifying their functions difficult, and *Hipks*  
40 are no exception. Individually, each of the four vertebrate *Hipks* are expendable for development,  
41 but together they are essential. The reason *Hipks* are necessary for development is unclear and  
42 comparing their developmental functions in a vertebrate model is difficult. However, the  
43 invertebrate fruit fly has a single essential *dhipk* gene that can be effectively removed and  
44 replaced with the individual vertebrate orthologs. We used this technique in the fruit fly to  
45 compare the developmental capacity of the four human *HIPKs* (*hHIPKs*). We found that *hHIPK1*  
46 and *hHIPK2* are each able to rescue the lethality caused by loss of *dhipk*, while *hHIPK3* and  
47 *hHIPK4* rescue minor patterning defects, but not lethality. We then leveraged the extensive adult  
48 phenotypes associated with genetic mutants in the fruit fly to detect altered developmental  
49 pathways when *hHIPKs* are mis-expressed. We found that expression of *hHIPKs 1-3* or *dhipk*  
50 each produce phenotypes that mimic loss of function of components of the Polycomb-group  
51 complex, which are needed to regulate expression of key developmental transcription factors.  
52 We therefore propose that *Hipks* inhibit Polycomb components in normal development, though  
53 details of this interaction remain uncharacterized.

## 54 **Introduction**

55 Homeodomain-interacting protein kinases (HIPKs) are a family of conserved  
56 serine/threonine kinases that are necessary for development in both invertebrate and vertebrate  
57 organisms [1]. In *Drosophila melanogaster*, combined maternal and zygotic loss of the single  
58 homologue *hipk* (referred to hereafter as *dhipk*) results in early embryonic lethality, while  
59 zygotic loss alone results in larval and pupal lethality [2]. In vertebrates, which have four *Hipk*  
60 genes (*Hipks1-4*), experiments performed in mice show that knockout of individual *Hipk* genes is  
61 not lethal, however knockout of both *Hipk1* and *Hipk2* genes results in embryonic lethality,  
62 likely due to functional redundancy between the paralogues [3]. Interestingly, *Hipk1/2* double  
63 knockout mice share phenotypes with *D. melanogaster dhipk* knockout organisms, such as  
64 defects in eye and head structure and aspects of patterning and development [2–4].

65 While past research suggests *Hipk1* and *Hipk2* have similar developmental roles based  
66 on their apparent functional redundancy, a comparison with the highly similar *Hipk3* or less  
67 similar *Hipk4* proteins has not been comprehensively assessed. The kinase domain is the region  
68 of greatest similarity between human HIPK (hHIPK) paralogs, a similarity that extends to the  
69 orthologous dHipk (Fig 1A). Hipks share other structural features outside of the kinase domain  
70 that have been implicated in protein-protein interactions and regulating *Hipk* stability and  
71 localization, which have been reviewed by our group and others [1,5]. Individual knockouts of  
72 the four *Hipks* have been generated in mice by several groups, with each knockout producing  
73 distinct phenotypes that may be indicative of either divergent functions, different temporal-  
74 spatial expression, or both. For example, *Hipk1* knockout mice appear grossly normal, *Hipk2*  
75 knockout mice exhibit impaired adipose tissue development, smaller body size, and higher  
76 incidence of premature death, *Hipk3* knockout mice exhibit impaired glucose tolerance, and male

77 *Hipk4* knockout mice are infertile due to abnormal spermiogenesis [6–10]. Unfortunately, these  
78 reported phenotypes come from a small number of sources focusing primarily on different  
79 tissues, so an exhaustive comparison of developmental roles for each Hipk is not possible using  
80 the current literature.

81 Vertebrate and *D. melanogaster* Hipks share conserved functions, as dHipk modulates  
82 signaling pathways important in normal development that are homologous to what various  
83 vertebrate Hipks interact with, including components of WNT, JNK, Hippo, and JAK/STAT  
84 signaling pathways [11–22]. Among Hipks, vertebrate Hipk2 in particular has been studied  
85 extensively for its role in responding to genotoxic stress, where it is stabilized upon lethal DNA  
86 damage and mediates p53-mediated cell death [23]. In fact, most studies involving vertebrate  
87 Hipk proteins focus on Hipk2, with few studies making comparisons with the highly similar  
88 Hipk1 and Hipk3. As of yet, no studies have assessed the functional equivalency of all vertebrate  
89 Hipks in development. Therefore, due to the similarity in known function between dHipk and  
90 vertebrate Hipks, and precedence for the study of human protein functions in *D. melanogaster*  
91 [24–26], we used the *D. melanogaster* model to compare the functions of the four hHIPKs. By  
92 expressing hHIPKs in both a *dhipk* knockout background, and in multiple tissues of a wild-type  
93 genetic background, we directly compared the developmental equivalence of the four hHIPKs  
94 under identical conditions. We uncovered previously unidentified functional similarities between  
95 hHIPKs in overall developmental potential, as well as unique differences when assessing their  
96 activity in developing epithelial tissues that form the adult wing, leg, and eye.

## 97 **Results**

### 98 **hHIPK1 and hHIPK2 rescue *dhipk* mutant lethality**

99           As a first step in characterizing hHIPKs in *D. melanogaster*, we tested whether  
100 expression of *hHIPKs* individually could rescue *dhipk* mutant phenotypes. To do this, we  
101 combined two existing *dhipk* mutant alleles to generate a transheterozygous (heteroallelic)  
102 knockout which gives rise to a severe zygotic loss of function phenotype (Lee *et al.*, 2009). This  
103 knockout approach has three main benefits. First, it combines a *dhipk[4]* null allele which is  
104 missing the majority of *dhipk* exons, with a less-severe *dhipk-Gal4* knockin/knockout allele that  
105 disrupts endogenous *dhipk* expression while allowing expression of *UAS*-driven transgenes in the  
106 endogenous *dhipk* domain due to the insertion of Gal4 encoding sequences in the *dhipk* locus (S1  
107 Fig). Second, this approach strongly decreases the amount *dhipk* mRNA (S2 Fig), without  
108 removing the maternal contribution. This is beneficial, since when maternal *dhipk* mRNA is  
109 removed, flies die at the embryonic stage, however mutants with a normal maternal *dhipk* mRNA  
110 contribution develop up to the late pupal stage, allowing for phenotypic analysis of fully  
111 developed adult tissues. Third, this approach reduces the effect of secondary mutations present in  
112 chromosomes carrying the individual *dhipk* mutant alleles that may contribute to lethality when  
113 made homozygous. In subsequent sections, *dhipk[4]/dhipk-Gal4* mutant flies are simply referred  
114 to as ‘*dhipk* mutants’.

115           As a proof of principle, we performed rescue experiments by expressing a *UAS*-  
116 controlled wildtype *dhipk* cDNA construct in the *dhipk* mutant background. We carried out  
117 rescue crosses at both 18° and 25°C to assay the effects of two levels of transgene expression,  
118 since the activity of Gal4 is enhanced at higher temperatures [27]. This was essential to  
119 determining optimal conditions, since our previous work has shown that overexpression of  
120 dHipk in a wildtype background causes numerous phenotypes including tumorigenic effects  
121 (Blaquiere and Wong *et al.*, 2018; Wong, Liao and Verheyen, 2019; Wong *et al.*, 2020). Crosses

122 were set up at both temperatures and the degree of adult survival was determined (Fig 1B). In  
123 cases of pupal lethality, we quantified the stage at which lethality occurred based on morphology  
124 of the fly within their pupal case, as shown in Fig 1C. Control flies heterozygous for the *dHipk-*  
125 *Gal4/+* allele show ~92% adult viability at 25°C and ~75% adult viability at 18°C. Zero *dhipk*  
126 mutant flies eclosed at either temperature, with death occurring at various pupal stages as  
127 indicated in Fig 1D. We assessed the ability of transgenic *UAS-dhipk* to rescue this lethality. At  
128 25°C when Gal4 has relatively high activity, *UAS-dhipk* rescued 12.7% of flies to eclosion, while  
129 at 18°C *UAS-dhipk* rescued 45.3% of flies to eclosion. We attribute the low rescue at the higher  
130 temperature to harmful effects caused by *dhipk* overexpression.

131 Having established our assay conditions, we tested the ability of the four *UAS-hHIPK*  
132 transgenes to rescue *dhipk* lethality (Fig 1D). Both *UAS-hHIPK1* and *UAS-hHIPK2* could rescue  
133 *dhipk* mutant flies to eclosion, though the degree to which they could do this varied. *UAS-HIPK1*  
134 rescued 6.8% of *dhipk* mutants at 18°C, while it was unable to rescue at 25°C. In contrast,  
135 HIPK2 rescued the lethality of ~56% of *dhipk* mutants at both temperatures. Strikingly, this  
136 rescue was more effective than the rescue by *UAS-dhipk*. Neither *UAS-HIPK3* nor *UAS-HIPK4*  
137 rescued adult lethality.

### 138 ***hHIPKs* variably rescue *dhipk* mutant patterning phenotypes**

139 While *UAS-hHIPK3* and *UAS-hHIPK4* do not rescue *dhipk* mutant lethality, it was  
140 unclear if these hHIPKs could rescue minor *dhipk* mutant patterning phenotypes observed in  
141 fully formed, yet inviable, pharate adults dissected from their pupal cases. *dhipk* mutant pharate  
142 adults have reduced compound eye size compared to wild-type and loss of the simple eyes,  
143 known as ocelli (Fig 2A-D) [2,31]. In addition, sensory bristles called macrochaetes that are  
144 anterior and posterior to the ocelli are lost in *dhipk* mutant pharate adults (Fig 2A, E, F).

145 Combined, these are the most obvious external phenotypes of pharate *dhipk* mutant flies.  
146 Therefore, we assessed the ability of the *UAS-hHIPKs* to rescue the reduced eye size, and loss of  
147 ocelli and bristles. As with the *dhipk* mutant lethality rescue experiments, we carried out these  
148 crosses at both 18°C and 25°C (Figs 2, S3).

149 Overexpression of *UAS-dhipk* was able to significantly rescue each *dhipk* mutant  
150 phenotype when raised at 25°C and rescued all but the anterior bristle loss at 18°C (Figs 2A, C-  
151 F, S3). For the *UAS-hHIPKs*, only *UAS-HIPK2* could significantly rescue the reduced eye size  
152 (Fig 2B), while expression of *UAS-HIPK4* caused a significant decrease in eye size when  
153 compared to *dhipk* mutants at both temperatures (Figs 2C, S3A). The loss of ocelli in *dhipk*  
154 mutants was rescued by both *UAS-HIPK2* and *UAS-HIPK3*, but not by *UAS-HIPK1* or *UAS-*  
155 *HIPK4* when raised at either temperature (Fig 2D, S3B). None of the *UAS-hHIPKs* could  
156 significantly rescue the loss of posterior or anterior bristles in *dhipk* mutants at 18° ( S3C, D  
157 Figs). In contrast, at 25° both *UAS-HIPK2* and *UAS-HIPK4* rescued the loss of both ocellar  
158 bristle pairs (Fig 2E, F). The ability of *UAS-dhipk* and *UAS-hHIPKs* to rescue *dhipk* mutant  
159 lethality, eye size, loss of ocelli, and loss of ocellar bristles are summarized in Fig 2G.  
160 Collectively these data revealed that within the same developmental context, the four hHIPKs  
161 can exert both shared and distinct effects that may reveal unique roles in development.

### 162 **hHIPK1 and 2 induce homeosis when expressed in wild-type *D. melanogaster* wings**

163 The ability of *UAS-hHIPKs* to rescue impaired development in *dhipk* mutant flies  
164 suggests that hHIPKs expressed in *D. melanogaster* perform the same functions as dHipk. The  
165 varying ability of hHIPKs to rescue *dhipk* mutant flies may be due to divergent conserved  
166 functions, which could be observable in external *D. melanogaster* phenotypes. If so, the use of  
167 *D. melanogaster* tissues may provide us with a simple method of comparing developmental



168 pathway alterations caused by the expression of hHIPKs. We therefore expressed hHIPKs in  
169 multiple wild-type tissues using the *dpp-Gal4* driver, which has well-defined expression patterns  
170 in the developing larval eye-antennal, wing, and leg imaginal discs [32]. To promote obvious  
171 phenotypic changes, these experiments were carried out at 29°C when Gal4 transcriptional  
172 activity is relatively high.

173       Expression of *UAS-hHIPK1* or *UAS-hHIPK2* causes notching of the adult wing when  
174 expressed using *dpp-Gal4*, *UAS-GFP* at 29°C (Fig 3A-C). The wing notching caused by *UAS-*  
175 *hHIPK1* expression is more pronounced than the phenotype caused by *UAS-hHIPK2*. Upon  
176 closer inspection, the region of the wing expressing either *UAS-hHIPK1* or *UAS-hHIPK2*  
177 contains small hairs and sensory bristles not normally found on the wing, instead resembling  
178 those found on halteres (Fig 3C). The altered development of a tissue causing it to fully or  
179 partially develop into another tissue is called homeotic transformation, or homeosis, and often  
180 occurs when key developmental regulators called homeotic (Hox) genes are dysregulated [33].  
181 Halteres and wings are derived from similar larval tissues, the primary difference in their  
182 development being that haltere imaginal discs express the Hox gene *Ubx*, which inhibits Notch  
183 signaling at the dorsal-ventral boundary, while wing imaginal discs do not express *Ubx* [34].  
184 Therefore, we stained 3<sup>rd</sup> instar larval wing imaginal discs expressing the individual hHIPKs or  
185 dHipk to determine if ectopic *Ubx* expression was occurring. We found that expression of either  
186 hHIPK1 or hHIPK2 caused induction of *Ubx* in the wing pouch, but not in other wing imaginal  
187 disc regions where *dpp-Gal4* is expressed (Fig 3D). The degree of *Ubx* induction was greater in  
188 wing imaginal discs expressing hHIPK1 compared to those expressing hHIPK2, which matches  
189 the severity of the adult wing notching phenotypes. We also stained the same wing imaginal  
190 discs for Wingless (Wg) protein, which is a Notch target at the dorsal-ventral boundary of the

191 wing pouch responsible for forming the edge of the wing. Since Notch signaling is inhibited by  
192 Ubx in the wing imaginal disc, we looked to see if Wg was decreased in response to *UAS-hHIPK*  
193 expression [34]. We found that wing imaginal discs expressing *UAS-hHIPK1* were missing Wg  
194 staining where *dpp-Gal4* intersects the dorsal-ventral boundary, while those expressing *UAS-*  
195 *hHIPK2* that induce lower levels of Ubx appeared to have intact Wg staining (S4 Fig). Together,  
196 this data suggests that hHIPK1 and hHIPK2 each induce Ubx expression in the wing pouch of  
197 wing imaginal discs, resulting in a wing-to-haltere homeotic transformation.

### 198 **hHIPKs variably induce cell death and proliferation**

199 Wing notching can arise when cells making up the distal wing margin die [35–37]. Given  
200 that HIPKs have been implicated in promoting cell death under certain situations, we asked  
201 whether the notching is due to ectopic cell death [23,38–40]. We performed TUNEL staining in  
202 3<sup>rd</sup> instar wing imaginal discs to detect double stranded DNA breaks, which occur primarily in  
203 apoptotic cells [41]. Both *UAS-hHIPK1* and *UAS-hHIPK2* induce wing notching, and while  
204 *UAS-hHIPK1* expression did cause a significant increase in TUNEL staining, *UAS-hHIPK2* did  
205 not, suggesting that the cell death is not the primary cause of the wing notching phenotype (Fig  
206 3E, F). Additionally, *UAS-dhipk* expression did cause a significant increase in TUNEL staining  
207 but did not produce the wing notching phenotype. Finally, while both *UAS-hHIPK1* and *UAS-*  
208 *dhipk* each caused a significant increase in TUNEL staining, the increased staining did not occur  
209 at the dorsal-ventral boundary of the wing pouch, which is the region that becomes the distal  
210 wing margin in the adult.

211 We have previously showed that using a different *UAS-dhipk* insertion strain (*UAS-*  
212 *Hipk<sup>3M</sup>*) that has higher expression levels than the *attP40* strain used in this work promotes cell  
213 proliferation in the wing imaginal disc [28–30]. Therefore, we tested the proliferative potential of

214 each of the *UAS-hHIPKs* by measuring the size of the *dpp>GFP* expression domain after  
215 transgene expression, since increased proliferation would lead to more GFP-expressing cells.  
216 Expression of *UAS-dhipk* or *UAS-hHIPK3* each significantly increased the area of the *dpp* stripe  
217 in wing imaginal discs proportional to the size of the entire tissue (Fig 3E, G). To measure  
218 proliferation directly we stained wing imaginal discs for the mitotic marker phospho-histone 3  
219 (PH3) and found that, similar to the results from measuring the *dpp-Gal4* expression area,  
220 expression of either *UAS-dhipk* or *UAS-hHIPK3* significantly increased cell proliferation in this  
221 tissue (Fig 3E, H). For both TUNEL and PH3 comparisons, the concentration of stain within the  
222 *dpp-Gal4* domain was measured both inside and outside of the main *dpp-Gal4* stripe. This data  
223 was used to calculate ratio of stain for each wing imaginal disc, which was then plotted to  
224 compare the genotypes (Fig 3I). We also expressed each of the *UAS-hHIPKs* or *UAS-dhipk* in  
225 eye-antennal imaginal discs using *ey-FLP*, which strongly drives *UAS* transgene expression in  
226 the entire tissue [42]. In this context, *UAS-hHIPK1*, *UAS-hHIPK3*, and *UAS-dhipk* each  
227 significantly increased the size of the eye-antennal imaginal discs, with the greatest increase  
228 found with hHIPK1 and hHIPK3, where obvious tissue distortions were also present (S5 Fig).  
229 Thus, we found that hHIPKs can variably induce proliferation in a tissue-dependent manner.

### 230 **hHIPK1 and 3 induce ectopic sex combs in male legs**

231 Expressing *UAS-dhipk* at high levels using *dpp-Gal4* at 29°C causes malformed adult  
232 legs [30]. When expressing *UAS-hHIPKs* with *dpp-Gal4*, we found that *UAS-hHIPK3* caused  
233 similarly malformed legs, while *UAS-hHIPK1* caused less severe malformations (Fig 4A, S1  
234 Table). Additionally, we found that *UAS-hHIPK1* and *UAS-hHIPK3* each caused ectopic sex  
235 comb formation on the middle and rear legs of males (Fig 4A, arrows, S1 Table). The *dpp-Gal4*  
236 domain is expressed in the region that produces sex combs in the leg-imaginal discs (Fig 4B).

237 Because the ectopic sex comb phenotype is strongly associated with expression of the Hox  
238 protein Sex combs reduced (Scr, Fig 4C), we stained the larval imaginal discs that give rise to  
239 the middle legs with anti-Scr antibodies and found that those expressing *UAS-hHIPK1* or *UAS-*  
240 *hHIPK3* consistently showed ectopic Scr expression (Fig 4D).

#### 241 ***UAS-dhipk* and *UAS-hHIPK1-3* expression phenocopies loss of Polycomb components**

242 When staining for Ubx and Scr expression to determine a molecular cause for the adult  
243 wing and leg phenotypes, respectively, we also stained other larval tissues using each antibody.  
244 Ectopic expression of Ubx was detected in the wing pouch region of wing imaginal discs from  
245 larvae expressing *UAS-hHIPK1* or *UAS-hHIPK2*, but not in the leg or eye-antennal imaginal  
246 discs, and not from any imaginal discs expressing *UAS-hHIPK3*, *hHIPK4*, or *dhipk* (data not  
247 shown). Similarly, while ectopic Scr expression was detected in the middle and rear leg imaginal  
248 discs in flies expressing *UAS-hHIPK1* or *UAS-hHIPK3*, we did not observe Scr in the wing or  
249 eye-antennal disc, nor in any imaginal discs expressing *UAS-hHIPK2*, *hHIPK4*, or *dHipk* (data  
250 not shown). This tissue specific induction of Hox genes by hHIPKs is similar to what others have  
251 observed with Polycomb Group complex (PcG) mutants [43,44]. Mutations in *Polycomb* (*Pc*), a  
252 PcG component, have been shown to cause similar wing, leg, and antenna phenotypes as we  
253 observed with hHIPK1 expression [45–48]. *Pc* mutants are also known to mis-express  
254 Abdominal B (AbdB) in multiple tissues and developmental stages, including larval wing  
255 imaginal discs, adult ovaries, and embryos [49–51]. We therefore stained larval tissues  
256 expressing *UAS-hHIPKs* to detect AbdB and found that *UAS-hHIPK1* alone was able to induce  
257 ectopic AbdB expression in wing, leg, and eye-antennal imaginal discs (Fig 5A-C). Of note, the  
258 regions of tissue where AbdB was induced in wing or leg imaginal discs were different  
259 compared to the domains where Ubx or Scr, respectively, were induced by hHIPK1.

260 We associated the homeotic transformations observed with *UAS-hHIPK* expression with  
261 inactive PcG components, however *UAS-dhipk* did not produce an obvious homeotic  
262 transformation indicative of PcG alteration when over-expressed using *dpp-Gal4*. Given our  
263 finding that dHipk and hHIPKs have similar functions in the *dhipk* mutant rescue experiment, the  
264 lack of comparable homeotic transformation phenotypes in the *dpp-Gal4* experiment was  
265 surprising. Historically, the majority of phenotypes associated with altered PcG were obtained  
266 using genetic mutants for various PcG components, so it is possible that the  
267 overgrown/malformed leg phenotype that *UAS-dhipk* overexpression produced is due to reduced  
268 PcG activity but was not observed in PcG mutants due to impaired earlier development.  
269 Therefore, to better assess the similarity of *UAS-dhipk* overexpression phenotypes to loss of PcG  
270 components, we used four *UAS-RNAi* lines targeting components of the two primary PcG  
271 complexes, PRC1 and PRC2, to reduce PcG activity in the *dpp-Gal4* domain. In addition to  
272 antenna-to-leg and wing-to-haltere transformations found with *Polycomb (Pc)*, *Sex-combs-extra*  
273 (*Sce*), and *Enhancer of zeste (E(z))* knockdown, we found that knockdown of, *Polyhomeotic (Ph-*  
274 *d)*, *Sce*, or *E(z)* each produced overgrown/malformed adult legs (S6 Fig). While not an explicit  
275 homeotic transformation, these overgrown/malformed legs phenocopy the expression of *UAS-*  
276 *dhipk* (Figs 4A, S6).

## 277 **Discussion**

278 Our results show that expressing human HIPKs 1-4 in *D. melanogaster* can substitute  
279 dHipk for many of its developmental functions. hHIPK1 and hHIPK2 are similar enough to  
280 dHipk that they each rescue lethality caused by mutant *dhipk*, while hHIPK3 and hHIPK4 are  
281 only capable of rescuing minor *dhipk* mutant patterning phenotypes. We also found that high-  
282 level expression of the hHIPKs in otherwise wild-type *D. melanogaster* tissues causes homeotic

283 transformations indicative of PcG inhibition. Our work to compare the developmental functions  
284 and potential of the four human HIPKs under identical conditions builds upon work done by  
285 many groups to identify Hipk functions through knockout and overexpression studies in multiple  
286 organisms [1]. One of the primary motivations for this work was to make comparisons between  
287 HIPKs that were not possible in vertebrate models or cell culture experiments. Isono *et al.* (2006)  
288 demonstrated that Hipk1 and Hipk2 have overlapping, functionally redundant roles in mouse  
289 embryonic development, however it was not clear if other Hipks also shared this similarity [3].  
290 Functional redundancy makes it difficult to study the functions of individual proteins in  
291 development, since the work necessary to make multiple strains of double or triple knockout  
292 mice is difficult, and sometimes impossible. It is much easier and financially practical to  
293 generate cell lines with multiple knockouts present, however in these you lose the perspective of  
294 the whole organism, which is key to identifying the necessity of these proteins in development.  
295 We thought the fly would be an excellent model to investigate this question of developmental  
296 necessity due to the strong similarity between dHipk and hHIPK protein sequences, and the  
297 simple and effective techniques we have available to knockout the single *dhypk* while expressing  
298 other hHIPKs in its place.

299 Our finding that hHIPK1 and hHIPK2 each rescue *dhypk* mutant lethality in flies suggests  
300 that the human HIPKs are functional in *D. melanogaster*, and that they share developmental roles  
301 both with each other, and with dHipk. This closely resembles mouse data from Isono *et al.*,  
302 where Hipk1 and Hipk2 were shown to have overlapping roles during development by analysis  
303 of double Hipk1/Hipk2 knockouts [3]. There is no information about the possible functional  
304 redundancy between Hipk3 or Hipk4, so we assessed the extent of their functional similarities in  
305 our experimental model. The inability of hHIPK3 or hHIPK4 to rescue *dhypk* mutant lethality

306 suggests their roles are more divergent from those of hHIPK1 and hHIPK2. This is not surprising  
307 for hHIPK4, since it lacks nearly all similarities to hHIPK1-3 and dHipk outside of the kinase  
308 domain, and even within the kinase domain it shares the least amount of similarity between them  
309 (see Fig 1). However, hHIPK3 shares nearly as much amino acid similarity with hHIPK2 as  
310 hHIPK1 does, so its inability to rescue *dhipk* mutant lethality may warrant further investigation  
311 into the significance of the amino acid sequence discrepancies between these proteins. The  
312 similarity between dHipk and hHIPK2 inferred from the strong *dhipk* mutant rescue by hHIPK2  
313 also suggests that studies on dHipk may be used as a quick way to identify new hHIPK2  
314 functions or targets.

315         While hHIPK1 rescues *dHipk* mutant lethality, it does not significantly rescue the  
316 patterning defects associated with *dhipk* mutants, unlike hHIPK2 which restores viability and  
317 patterning defects. In contrast, hHIPK3 and hHIPK4 rescue the loss of ocelli and loss of ocellar  
318 bristles in *dhipk* mutants, respectively, but not lethality. The limited depth of this analysis can  
319 only conclude that hHIPK3 and hHIPK4 may retain limited ancestral function or are so divergent  
320 that they rescue these phenotypes by some new mechanism. The comparison of protein sequence  
321 similarity, and previously published cellular localization data suggests that the normally nuclear  
322 hHIPK3 fits the former category, with cytoplasmic hHIPK4 fitting the latter. Similarly, the  
323 ability of hHIPK1 to rescue *dhipk* mutant lethality, but not patterning defects, may indicate  
324 functional divergence.

325         The ability of hHIPK1 and hHIPK2 to each rescue *dhipk* mutant lethality is strong  
326 evidence that hHIPKs were functioning correctly in *D. melanogaster*, however this experiment  
327 did not demonstrate what pathways were being modulated by hHIPK expression. Signaling  
328 pathway mutations are well characterized in *D. melanogaster*, to the extent that observation of

329 distinct mutant phenotypes in adult cuticular structures often allows researchers to infer which  
330 signaling pathways or protein complexes are affected. Therefore, to reliably detect dHipk or  
331 hHIPK mediated changes in signaling, we needed to drive expression in well-defined regions of  
332 larval tissues that produce adult wing, leg, and head structures.

333 The well-established *dpp-Gal4* driver was selected for its common use among *D.*  
334 *melanogaster* researchers, and well-defined expression in multiple larval tissues, defined by co-  
335 expression of GFP. Expression of hHIPK1, hHIPK2, and hHIPK3 using *dpp-Gal4* each produced  
336 varied adult homeotic transformation phenotypes. hHIPK1 and hHIPK2 each caused wing-to-  
337 haltere transformations along with Ubx induction in the wing imaginal discs, while hHIPK3 and  
338 hHIPK4 had little to no effect on the adult wing structure and did not induce Ubx expression.  
339 Only wing imaginal discs expressing hHIPK1 showed a noticeable decrease in Wg staining at the  
340 dorsal-ventral boundary, suggesting that the lower level of Ubx induction caused by hHIPK2 was  
341 less able to decrease Notch signaling. hHIPK1 and hHIPK3 caused 2<sup>nd</sup> and 3<sup>rd</sup> legs to gain sex  
342 combs in males along with Scr induction in the corresponding leg imaginal discs, while hHIPK2  
343 and hHIPK4 had no visible effect on these legs, nor did they induce ectopic Scr in leg imaginal  
344 discs. Finally, hHIPK1 alone was able to cause loss of arista (S6 Fig), which is a minor antenna-  
345 to-leg transformation [52]. While the Hox protein Antp is frequently found to be ectopically  
346 expressed in eye-antennal imaginal discs that undergo antenna-to-leg transformations, we did not  
347 observe this (data not shown). However, partial antenna-to-leg transformations can occur without  
348 detectable levels of Antp [52].

349 Hipks are named for their initial discovery as binding partners of proteins containing  
350 homeodomains, so their ability to cause homeotic transformations may not seem to be a  
351 surprising result. While several studies have found direct protein-protein interactions between



352 Hipks and homeodomain-containing proteins [53–55], it is important to note that the homeotic  
353 transformation phenotypes we have observed in response to hHIPK expression are not indicative  
354 of direct interaction with Hox proteins. Instead, the three homeotic transformations observed in  
355 these experiments are well characterized phenotypes associated with inactive PcG components,  
356 resulting in the upregulation of Hox gene transcription [56].

357 PcG components are broadly split into two protein complexes, Polycomb repressive  
358 complex 1 (PRC1) and PRC2, which act together to repress genes during development by  
359 regulating chromatin remodeling [56]. Previous research has shown that hHIPK2 can interact  
360 with and phosphorylate CBX4/Pc2, a PRC1 component homologous to *D. melanogaster*  
361 Polycomb (Pc), in the early response to DNA damage, however this interaction was found to  
362 promote transcriptional silencing in this context [57]. More recently, the same group has found  
363 that under otherwise normal conditions, targeting hHIPK2 to specific DNA regions causes de-  
364 condensation and de-repression of chromatin at those genomic loci [58]. The latter result  
365 supports our finding of normally repressed homeotic genes becoming de-repressed in response to  
366 hHIPK expression, however interactions between Hipks and PRC1 or PRC2 components that are  
367 important in the context of normal development have not yet been described. Given the strong  
368 homeotic transformations caused by hHIPK1, 2, and 3 presented in this research that are  
369 independent of DNA damage, we suspect that Hipks may guide development at least partially by  
370 inhibiting PcG components. An issue with this hypothesis is that dHipk overexpression did not  
371 produce any visible homeotic transformations like those produced by hHIPKs1-3. However, the  
372 leg deformities we observed in flies expressing dHipk, hHIPK1, and hHIPK3 are similar to what  
373 we observed when PcG components were knocked down with RNAi. Therefore, we suspect that  
374 dHipks are similarly inhibiting PcG, though more work needs to be done to detail these

375 interactions, since the varying phenotypes caused by each hHIPK in *D. melanogaster* suggest  
376 that they are acting differently.

377         An alternative mechanism for how Hipks cause the various homeotic transformation  
378 phenotypes is by promoting the activity of proteins in the Trithorax group (TrxG) complex. TrxG  
379 proteins broadly act to promote gene expression by decreasing the compaction of chromatin,  
380 thereby increasing its accessibility [56]. Previous research has shown that expression of *D.*  
381 *melanogaster* TrxG component *trx* in the same *dpp-Gal4* domain used in this research produces  
382 nearly identical homeotic transformations as *UAS-hHIPK1* [52]. Because TrxG and PcG  
383 complex activities directly counter each other, it is difficult to assess whether these homeotic  
384 transformations are due to TrxG promotion or PcG inhibition. However, previous research  
385 describing Hipk/PcG interactions lead us to suspect that Hipks cause homeotic transformations  
386 through interactions with PcG components, not TrxG. Moving forward, we will investigate how  
387 the different Hipks alter chromatin, as well as clarifying the importance of this activity in  
388 development.

389         The pattern of Hox gene induction caused by HIPK expression is an important  
390 consideration. For example, the Hox protein Ubx is ectopically induced by hHIPK1 and hHIPK2,  
391 but only in the wing imaginal disc, not the leg or eye-antennal imaginal discs, and only in the  
392 wing pouch region, despite the domain of hHIPK expression being broader in this tissue. At the  
393 same time, the Hox protein AbdB is ectopically induced by hHIPK1 expression in both the wing  
394 pouch and the notum regions of the wing imaginal disc and is ectopically induced by hHIPK1 in  
395 other tissues. Clearly the Hox protein induction by hHIPKs is dependent on tissue region. The  
396 tissue-dependent response to hHIPK expression in these larval tissues highlights the importance

397 of studying these proteins in a tissue context, rather than a cellular context, as the overall effect  
398 of HIPKs seems to vary depending on a cell's existing developmental fate or pluripotency.

399 For the first time, all four vertebrate HIPKs have been assessed for their comparative  
400 developmental functions and potential under identical conditions. Together, these results show  
401 that hHIPK1 and hHIPK2 each function well enough in *D. melanogaster* to rescue lethality  
402 caused by mutant *dhipk*, the single fly Hipk homologue. Furthermore, hHIPK3 and hHIPK4 can  
403 rescue *dhipk* mutant patterning phenotypes. When expressed in domains that develop into adult  
404 cuticular structures, dHipk and hHIPKs1-3 each produce phenotypes that resemble loss of PcG  
405 components, suggesting that Hipks function to inhibit PcG components. This study collectively  
406 shows that Hipks share many conserved functions across species and validates the use of *D.*  
407 *melanogaster* as a tool to understand this complex and multi-faceted kinase family.

408

## 409 **Materials and methods**

### 410 **Fly Stocks and Genetic Crosses**

411 Previously described fly strains used in this work are **1:** *w<sup>1118</sup>*, **2:** *dhipk-Gal4*  
412 (*hipk[BG00855]*, BDSC #12779), **3:** *UAS-GFP* (BDSC #5431), **4:** *UAS-pc<sup>RNAi</sup>* (BDSC #33964),  
413 **5:** *UAS-e(z)<sup>RNAi</sup>* (BDSC #36068), **6:** *UAS-sce<sup>RNAi</sup>* (BDSC #67924), **7:** *UAS-ph-d<sup>RNAi</sup>* (BDSC  
414 #63018) **8:** *dhipk<sup>Δ</sup>* [2], **9:** *dpp-Gal4/TM6B* [32], **10:** *UAS-HA-dhipk<sup>attp40</sup>* [59], **11:** *eyFLP* ;  
415 *act>y<sup>+</sup>>Gal4*, *UAS-GFP* [42]. The details of how *UAS-myc-hHIPK1<sup>attp40</sup>*, *UAS-myc-*  
416 *hHIPK2<sup>attp40</sup>*, *UAS-myc-hHIPK3<sup>attp40</sup>*, and *UAS-myc-hHIPK4<sup>attp40</sup>* were generated for this work is  
417 detailed in the section titled “Generation of plasmids and *UAS-hHIPK* fly stocks.” *dhipk* mutant  
418 rescue experiments were performed at 18°C and 25°C to determine the ideal Hipk expression

419 levels by altering the abundance of Gal4-driven *UAS-Hipk* constructs, while experiments using  
420 *dpp-Gal4* were performed at 29°C to strongly increase *UAS-Hipk* expression. Flies were raised  
421 on standard media composed of 0.8g agar, 2.3g yeast, 5.7g cornmeal, and 5.2mL molasses per  
422 100ml. “BDSC” is an acronym for the Bloomington Drosophila Stock Center.

## 423 **Terminology**

424 As this study investigates human proteins expressed in *D. melanogaster*, it was necessary  
425 to clearly indicate which species of protein is specified in each experiment. Throughout this  
426 paper, *D. melanogaster* Hipk protein is written “dHipk” while mutants or DNA are referred to as  
427 *dhipk*, human HIPKs are written as “hHIPKs”, and in cases where reference is made to proteins  
428 from both species, “Hipks” is used.

## 429 **Generation of plasmids and transgenic *UAS-hHIPK* fly stocks**

430 Plasmids containing the cDNA for human HIPKs were generously provided by two  
431 groups. Dr. Lienhard Schmitz gifted a plasmid containing *hHIPK1* isoform 1, and Dr. Seong-  
432 Tae Kim provided us plasmids containing *hHIPK3* isoform 2 and *hHIPK4*. The cDNA for  
433 *hHIPK2* isoform 1 was synthesized by GenScript® to match the NCBI reference sequence  
434 NM\_022740.4. In cases where the gifted cDNAs did not exactly correspond to the translated  
435 NCBI reference protein sequences (NP\_938009.1 for hHIPK1, NP\_001041665.1 for hHIPK3,  
436 and NP\_653286.2 for hHIPK4), we performed site-directed mutagenesis using the GeneArt™  
437 Site-Directed Mutagenesis PLUS system to correct the cDNA sequence. The cDNAs that  
438 corresponded to these reference sequences were then tagged with N-terminal Myc-epitope tags  
439 before being cloned into a pUAST-attB backbone vector using NotI and XhoI restriction sites for  
440 *hHIPK1* and *hHIPK2*, BglII and KpnI sites for *hHIPK3*, and BglII and XhoI sites for *hHIPK4*.

441 The four pUAST-attB-Myc-hHIPK plasmids were then sent to BestGene Inc. for injection into  
442 *D. melanogaster* embryos containing an attP40 site, allowing for stable integration to identical  
443 sites on the second chromosome. The resulting fly stocks each contain a single *Myc-hHIPK*  
444 cDNA under the control of a UAS promoter that is expressed in any cell expressing a Gal4  
445 transcription factor.

#### 446 **Adult *D. melanogaster* imaging and scoring rescue phenotypes**

447 To quantify the stages of pupal lethality in the *dhipk* mutant rescue experiment, crosses  
448 were performed with 24-hour egg lays, and all non-Tubby pupal cases were collected 5 days  
449 after flies were expected to have eclosed. Pupal cases were scored into 5 categories: 1) “eclosed”  
450 flies were counted when pupal cases were empty. 2) Flies were scored as “pharate” when the  
451 adult head, thorax, and abdomen were fully developed and pigmented, but they were unable to  
452 eclose. 3) “Pupal lethal 1” was assigned to pupae that had defined head, thorax, and abdomen  
453 within the pupal case, but only had partial pigmentation. 4) “Pupal lethal 2” was assigned to  
454 pupae that had defined head, thorax, and abdomen, but no pigmentation. 5) “Pupal lethal 3” was  
455 assigned to pupae that had no defined head, thorax, or abdomen.

456 The pharate pupae and viable adults from the *dhipk* mutant viability rescue experiment  
457 were collected, and if necessary, gently removed from their pupal cases with dissecting tweezers  
458 before being immediately placed in 70% ethanol and stored at -20°C for preservation until they  
459 were photographed for the assessment and quantification of head phenotypes. Six randomly  
460 selected female flies from each cross were used for phenotype quantification. To image these  
461 flies, we used an 8-well BD Falcon CultureSlide (REF 354118) modified to have each well filled  
462 1/3 with SYLGARD™ 184. Insect pins were bent at 90° and pinned into the solidified

463 SYLGARD so that the 90° bend was located near the top of the plastic well (S8 Fig).  
464 Immediately before imaging, flies were removed from 70% ethanol at -20°C to individual wells  
465 filled with 70% ethanol at room temperature and pinned to the planted insect pins while  
466 remaining submerged. The slides were then topped off with excess 70% ethanol before a  
467 coverslip was placed atop the wells. A resulting slide contained six female flies of the same  
468 genotype pinned at a stable position for imaging near the surface of the coverslip, while  
469 remaining submerged in ethanol. The ethanol was required to prevent flies drying out during  
470 imaging, and the coverslip was required to prevent vibrations on the surface of the ethanol that  
471 interfered with imaging. The same six flies were photographed three times to capture each eye  
472 (two images per fly) and the top of the head (one image per fly). Lighting was provided by an  
473 LED strip modified to encircle the CultureSlide, and a folded white tissue was placed under the  
474 CultureSlide to obtain a white/grey background.

475         Adult wings and legs were dissected in ethanol, then gently dried on a paper towel before  
476 being submerged in a small drop of Aquatex® (Sigma-Aldrich #1.08562) and covered in a  
477 coverslip. Small weights (EM stubs) were then placed on the coverslips while being heated to  
478 60°C for 1 hour. All adult phenotypes were imaged using a Zeiss Axioplan2 microscope with an  
479 Optika C-P6 camera system.

#### 480 **HIPK Protein Sequence Alignment**

481         After confirming that our cDNA sequences correctly translated to the NCBI reference  
482 protein sequences for hHIPK1 isoform 1 (NP\_938009.1), hHIPK2 isoform 1 (NP\_073577.3),  
483 hHIPK3 isoform 2 (NP\_001041665.1), hHIPK4 (NP\_653286.2), and dHipk isoform A  
484 (NP\_612038.2), each of the dHipk or hHIPK sequences were individually compared to hHIPK2  
485 using the NCBI Multiple Sequence Alignment (MSA) tool [60]. On the MSA website, the Hipk

486 that was being compared to hHIPK2 was set as the anchor. The FASTA alignment for this  
487 comparison was then downloaded and opened in Jalview (version 2.11.1.2) to extract the  
488 numerical conservation data between the Hipk in question and hHIPK2 [61]. The numerical  
489 conservation data (from 0 = no conservation, to 11 = identical amino acid) was then extracted  
490 and sent to Microsoft Excel (Excel 365), where numerical columns were converted to a color  
491 gradient. Each comparison to HIPK2 was lined up based on the location of the first conserved  
492 region. An image of the comparison was then exported as a PNG to Inkscape (version 0.92.4) for  
493 domain annotation, based on the NCBI annotation of the kinase domain.

#### 494 **Immunocytochemistry and microscopy**

495 Late third instar larval imaginal discs were dissected and stained using previously  
496 described methods [28]. The following primary antibodies were used: mouse anti-Ubx (1:50,  
497 DSHB Ubx FP3.38) mouse anti-Scr (1:50, DSHB anti-Scr 6H4.1), mouse anti-Abd-B (1:50,  
498 DSHB anti-ABD-B (1A2E9)), mouse anti-Antp (1:50, DSHB anti-Antp 4C3), mouse anti-Wg  
499 (1:50, DSHB 4D4), rabbit anti-PH3 Ser10 (1:500, Cell Signaling #9701S). Imaginal discs were  
500 imaged on a Zeiss LSM 880 using a dry 10x lens. Z-stacks were acquired, and images were  
501 processed in FIJI, where Z-stacks were converted to maximum intensity projections.

#### 502 **PH3 and TUNEL assay quantification using wing imaginal discs**

503 Dual PH3 and TUNEL assay staining was performed by first completing the normal wing  
504 disc dissection, fixing, washing, and primary antibody treatment protocol noted previously for  
505 PH3 (1:500 in block, Cell Signaling #9701S). Before secondary antibody staining, TUNEL  
506 staining was performed using the Roche *In Situ* Cell Death Detection Kit, TMR Red (Version 12,  
507 Cat. No. 12 156 792 910). Once the tissues were washed after the primary antibody treatment,

508 the wash was removed, and 100ul of combined TUNEL assay components (92.7μL labelling  
509 solution + 8.3μL enzyme solution) was added to the tissues in a 1.6mL Eppendorf tube, along  
510 with 1:1000 goat α-rabbit fluorophore conjugated secondary antibody (Jackson  
511 ImmunoResearch, product # 711-605-152). The tissues were then incubated overnight (~16  
512 hours) on a rocker in the dark at 4°C. Staining reagents were then removed, and samples were  
513 rinsed quickly with PBT before staining for 30 minutes with 1:500 DAPI solution. After DAPI  
514 staining, four more 10-minute washes were performed before wing discs were separated from  
515 other tissues and mounted in 70% glycerol on microscope slides. Wing imaginal discs were  
516 imaged as described in the previous section. Using FIJI [62–64], the area of the whole wing  
517 imaginal disc and *dpp-GFP* domains were measured, and PH3 or TUNEL positive cells were  
518 counted within each region automatically using the Analyze → Analyze Particles tool after  
519 thresholding. The change in concentration of PH3 or TUNEL positive cells between the *dpp*-  
520 GFP domain and the rest of the disc was then calculated.

## 521 **RNA extraction and qPCR**

522 RNA extractions were performed using the Qiagen RNeasy® Plus Min Kit (#74134).  
523 RNA that was used to confirm reduced *dHipk* mRNA in *dhipk* mutant and rescue crosses, as well  
524 as verify the correct *hHIPK* expression in the rescue crosses, was collected from four combined  
525 wandering 3<sup>rd</sup> instar larvae (two male and two female) for each cross. Larvae were washed in  
526 PBS before being spot dried on a clean paper towel and transferred to 300μl buffer RLT Plus,  
527 supplemented with freshly added β-mercaptoethanol to 1%. Larvae were homogenized with  
528 pestles by hand in 1.6mL tubes before being centrifuged for 3 minutes at maximum speed to  
529 pellet debris. Supernatant was transferred to a gDNA Eliminator spin column, with the remaining  
530 RNA extraction steps following the manufacturer's instructions.



531 cDNA synthesis was performed using ABM® OneScript® Plus cDNA Synthesis Kit  
532 (#G236). For each sample, 100ng mRNA was used in combination with Oligo (dT) primers to  
533 perform first-strand cDNA synthesis of poly-adenylated mRNA following manufacturer's  
534 instructions. Resulting cDNA was diluted 1:5 before being used for qPCR.

535 qPCR for each sample/primer mix was performed in triplicate with 10µl samples  
536 (technical replicates), utilizing Biorline's sensiFAST SYBR Lo-ROX Kit (#BIO-94005) on an  
537 Applied Biosystems QuantStudio 3. 1µl of diluted cDNA was used per reaction. Primers  
538 targeting *rp49* were used as reference targets.

### 539 **Primers**

540 *rp49* F: AGCATACAGGCCCAAGATCG

541 *rp49* R: TGTTGTCGATACCCTTGGGC

542 *dhipk* F: GCACCACAACTGCAACTACG

543 *dhipk* R: ACGTGATGATGGTGCGAACTC

544 *hHIPK1* F: GACCAGTGCAGCACAACCAC

545 *hHIPK1* R: GCCATGCTGGAAGGTGTAGG

546 *hHIPK2* F: GTCCACCAACCTGACCATGA

547 *hHIPK2* R: GGAGACTTCGGGATTGGCTA

548 *hHIPK3* F: GACATCAGCATTCCAGCAGC

549 *hHIPK3* R: GCTGTCTTCTGTGCCCAAAG

550 *hHIPK4* F: GCCTGAGAACATCATGCTGG

551 *hHIPK4* R: GCGACTGGATGTATGGCTCC

552

## 553 **Acknowledgements**

554           We thank the following undergraduate students who participated in this research while  
555 training in the lab: Madeline Malczewska, Emerson Mohr, Justin Vinluan, and Rayna Brands.  
556 Stocks obtained from the Bloomington Drosophila Stock Center (NIH P40OD018537) were used  
557 in this study. The *eyFLP* stock was a gift from Amit Singh. We would like to acknowledge the  
558 Developmental Studies Hybridoma Bank for providing antibodies. We thank Drs. Lienhard  
559 Schmitz and Seong-Tae Kim for donating plasmids containing *hHIPK* cDNAs. We are grateful  
560 for the advice provided by Drs. Gritta Tettweiler and Don Sinclair on various aspects of this  
561 research. Also, we thank Z. Ding for help in generating the *UAS-HA-dHipk<sup>attp40</sup>* plasmid.

562

563

## 564 **References**

- 565 1. Blaquiére JA, Verheyen EM. Homeodomain-Interacting Protein Kinases: Diverse and  
566 Complex Roles in Development and Disease. *Current Topics in Developmental Biology*.  
567 2017. doi:10.1016/bs.ctdb.2016.10.002
- 568 2. Lee W, Andrews BC, Faust M, Walldorf U, Verheyen EM. Hipk is an essential protein  
569 that promotes Notch signal transduction in the *Drosophila* eye by inhibition of the global  
570 co-repressor Groucho. *Dev Biol*. Nov. 5, 20. 2009;325: 263–72.  
571 doi:10.1016/j.ydbio.2008.10.029
- 572 3. Isono K, Nemoto K, Li Y, Takada Y, Suzuki R, Katsuki M, et al. Overlapping roles for  
573 homeodomain-interacting protein kinases hipk1 and hipk2 in the mediation of cell growth  
574 in response to morphogenetic and genotoxic signals. *Mol Cell Biol*. 2006;26: 2758–71.  
575 doi:10.1128/MCB.26.7.2758-2771.2006
- 576 4. Inoue T, Kagawa T, Inoue-Mochita M, Isono K, Ohtsu N, Nobuhisa I, et al. Involvement  
577 of the Hipk family in regulation of eyeball size, lens formation and retinal morphogenesis.  
578 *FEBS Lett*. 2010;584: 3233–3238. doi:10.1016/j.febslet.2010.06.020
- 579 5. Rinaldo C, Siepi F, Prodosmo A, Soddu S. HIPKs: Jack of all trades in basic nuclear  
580 activities. *Biochim Biophys Acta*. 2008;1783: 2124–9. doi:10.1016/j.bbamcr.2008.06.006
- 581 6. Kondo S, Lu Y, Debbas M, Lin AW, Sarosi I, Itie A, et al. Characterization of cells and  
582 gene-targeted mice deficient for the p53-binding kinase homeodomain-interacting protein  
583 kinase 1 (HIPK1). *Proc Natl Acad Sci U S A*. 2003;100: 5431–6.  
584 doi:10.1073/pnas.0530308100

- 585 7. Sjölund J, Pelorosso FG, Quigley DA, DelRosario R, Balmain A. Identification of Hipk2  
586 as an essential regulator of white fat development. *Proc Natl Acad Sci U S A*. 2014;111:  
587 7373–8. doi:10.1073/pnas.1322275111
- 588 8. Chalazonitis A, Tang A a, Shang Y, Pham TD, Hsieh I, Setlik W, et al. Homeodomain  
589 interacting protein kinase 2 regulates postnatal development of enteric dopaminergic  
590 neurons and glia via BMP signaling. *J Neurosci*. 2011;31: 13746–57.  
591 doi:10.1523/JNEUROSCI.1078-11.2011
- 592 9. Shojima N, Hara K, Fujita H, Horikoshi M, Takahashi N, Takamoto I, et al. Depletion of  
593 homeodomain-interacting protein kinase 3 impairs insulin secretion and glucose tolerance  
594 in mice. *Diabetologia*. 2012;55: 3318–30. doi:10.1007/s00125-012-2711-1
- 595 10. Crapster JA, Rack PG, Hellmann ZJ, Le AD, Adams CM, Leib RD, et al. HIPK4 is  
596 essential for murine spermiogenesis. *Elife*. 2020;9. doi:10.7554/eLife.50209
- 597 11. Chen J, Verheyen EM. Homeodomain-interacting protein kinase regulates Yorkie activity  
598 to promote tissue growth. *Curr Biol*. 2012/07/31. 2012;22: 1582–6.  
599 doi:10.1016/j.cub.2012.06.074
- 600 12. Poon CLC, Zhang X, Lin JI, Manning SA, Harvey KF. Homeodomain-interacting protein  
601 kinase regulates Hippo pathway-dependent tissue growth. *Curr Biol*. 2012;22: 1587–94.  
602 doi:10.1016/j.cub.2012.06.075
- 603 13. Lan H-C, Li H-J, Lin G, Lai P-Y, Chung B. Cyclic AMP stimulates SF-1-dependent  
604 CYP11A1 expression through homeodomain-interacting protein kinase 3-mediated Jun N-  
605 terminal kinase and c-Jun phosphorylation. *Mol Cell Biol*. 2007;27: 2027–36.  
606 doi:10.1128/MCB.02253-06

- 607 14. Rochat-Steiner V, Becker K, Micheau O, Schneider P, Burns K, Tschopp J. FIST/HIPK3:  
608 a Fas/FADD-interacting serine/threonine kinase that induces FADD phosphorylation and  
609 inhibits fas-mediated Jun NH(2)-terminal kinase activation. *J Exp Med*. 2000;192: 1165–  
610 74. doi:10.1084/jem.192.8.1165
- 611 15. Hikasa H, Sokol SY. Phosphorylation of TCF proteins by homeodomain-interacting  
612 protein kinase 2. *J Biol Chem*. 2011/02/03. 2011;286: 12093–12100.  
613 doi:10.1074/jbc.M110.185280
- 614 16. Lee W, Swarup S, Chen J, Ishitani T, Verheyen EM. Homeodomain-interacting protein  
615 kinases (Hipks) promote Wnt/Wg signaling through stabilization of beta-catenin/Arm and  
616 stimulation of target gene expression. *Development*. 2008/12/18. 2009;136: 241–251.  
617 doi:10.1242/dev.025460
- 618 17. Louie SH, Yang XY, Conrad WH, Muster J, Angers S, Moon RT, et al. Modulation of the  
619 beta-catenin signaling pathway by the dishevelled-associated protein Hipk1. *PLoS One*.  
620 2009;4: e4310. doi:10.1371/journal.pone.0004310
- 621 18. Shimizu N, Ishitani S, Sato A, Shibuya H, Ishitani T. Hipk2 and PP1c cooperate to  
622 maintain Dvl protein levels required for Wnt signal transduction. *Cell Rep*. 2014;8: 1391–  
623 404. doi:10.1016/j.celrep.2014.07.040
- 624 19. Swarup S, Verheyen EM. *Drosophila* homeodomain-interacting protein kinase inhibits the  
625 Skp1-Cul1-F-box E3 ligase complex to dually promote Wingless and Hedgehog signaling.  
626 *Proc Natl Acad Sci U S A*. 2011/06/02. 2011;108: 9887–92.  
627 doi:10.1073/pnas.1017548108
- 628 20. Hofmann TG, Stollberg N, Schmitz ML, Will H. HIPK2 regulates transforming growth

- 629 factor-beta-induced c-Jun NH(2)-terminal kinase activation and apoptosis in human  
630 hepatoma cells. *Cancer Res.* 2003;63: 8271–7. Available:  
631 <http://www.ncbi.nlm.nih.gov/pubmed/14678985>
- 632 21. Hofmann TG, Jaffray E, Stollberg N, Hay RT, Will H. Regulation of homeodomain-  
633 interacting protein kinase 2 (HIPK2) effector function through dynamic small ubiquitin-  
634 related modifier-1 (SUMO-1) modification. *J Biol Chem.* 2005;280: 29224–29232.  
635 doi:10.1074/jbc.M503921200
- 636 22. Huang H, Du G, Chen H, Liang X, Li C, Zhu N, et al. *Drosophila* Smt3 negatively  
637 regulates JNK signaling through sequestering Hipk in the nucleus. *Development.*  
638 2011/05/13. 2011;138: 2477–2485. doi:10.1242/dev.061770
- 639 23. D’Orazi G, Cecchinelli B, Bruno T, Manni I, Higashimoto Y, Saito S, et al.  
640 Homeodomain-interacting protein kinase-2 phosphorylates p53 at Ser 46 and mediates  
641 apoptosis. *Nat Cell Biol.* 2002;4: 11–19. doi:10.1038/ncb714
- 642 24. Link N, Bellen HJ. Using *Drosophila* to drive the diagnosis and understand the  
643 mechanisms of rare human diseases. *Development.* 2020;147. doi:10.1242/dev.191411
- 644 25. McGurk L, Berson A, Bonini NM. *Drosophila* as an In Vivo Model for Human  
645 Neurodegenerative Disease. *Genetics.* 2015;201: 377–402.  
646 doi:10.1534/genetics.115.179457
- 647 26. Ugur B, Chen K, Bellen HJ. *Drosophila* tools and assays for the study of human diseases.  
648 *Dis Model Mech.* 2016;9: 235–44. doi:10.1242/dmm.023762
- 649 27. Duffy JB. GAL4 system in *Drosophila*: a fly geneticist’s Swiss army knife. *Genesis.*

- 650 2002;34: 1–15. doi:10.1002/gene.10150
- 651 28. Blaquiere JA, Wong KKL, Kinsey SD, Wu J, Verheyen EM. Homeodomain-interacting  
652 protein kinase promotes tumorigenesis and metastatic cell behavior. *Dis Model Mech*.  
653 2018;11. doi:10.1242/dmm.031146
- 654 29. Wong KKL, Liao JZ, Verheyen EM. A positive feedback loop between Myc and aerobic  
655 glycolysis sustains tumor growth in a *Drosophila* tumor model. *Elife*. 2019;8.  
656 doi:10.7554/eLife.46315
- 657 30. Wong KKL, Liu TW, Parker JM, Sinclair DAR, Chen YY, Khoo KH, et al. The nutrient  
658 sensor OGT regulates Hipk stability and tumorigenic-like activities in *Drosophila*. *Proc*  
659 *Natl Acad Sci U S A*. 2020. doi:10.1073/pnas.1912894117
- 660 31. Blaquiere JA, Lee W, Verheyen EM. Hipk promotes photoreceptor differentiation through  
661 the repression of *Twin* of *eyeless* and *Eyeless* expression. *Dev Biol*. 2014;390: 14–25.  
662 doi:10.1016/j.ydbio.2014.02.024
- 663 32. Staehling-Hampton K, Jackson PD, Clark MJ, Brand AH, Hoffmann FM. Specificity of  
664 bone morphogenetic protein-related factors: cell fate and gene expression changes in  
665 *Drosophila* embryos induced by decapentaplegic but not 60A. *Cell Growth Differ*. 1994;5:  
666 585–93.
- 667 33. Pearson JC, Lemons D, McGinnis W. Modulating Hox gene functions during animal body  
668 patterning. *Nat Rev Genet*. 2005;6: 893–904. doi:10.1038/nrg1726
- 669 34. Weatherbee SD, Halder G, Kim J, Hudson A, Carroll S. Ultrabithorax regulates genes at  
670 several levels of the wing-patterning hierarchy to shape the development of the *Drosophila*

- 671 haltere. *Genes Dev.* 1998;12: 1474–82. doi:10.1101/gad.12.10.1474
- 672 35. Brun S, Rincheval-Arnold A, Colin J, Risler Y, Mignotte B, Guénal I. The myb-related  
673 gene stonewall induces both hyperplasia and cell death in *Drosophila*: rescue of fly  
674 lethality by coexpression of apoptosis inducers. *Cell Death Differ.* 2006;13: 1752–62.  
675 doi:10.1038/sj.cdd.4401861
- 676 36. Adachi-Yamada T, Fujimura-Kamada K, Nishida Y, Matsumoto K. Distortion of  
677 proximodistal information causes JNK-dependent apoptosis in *Drosophila* wing. *Nature.*  
678 1999;400: 166–169. doi:10.1038/22112
- 679 37. Giraldez AJ, Cohen SM. Wingless and Notch signaling provide cell survival cues and  
680 control cell proliferation during wing development. *Development.* 2003;130: 6533–43.  
681 doi:10.1242/dev.00904
- 682 38. Link N, Chen P, Lu WJ, Pogue K, Chuong A, Mata M, et al. A collective form of cell  
683 death requires homeodomain interacting protein kinase. *J Cell Biol.* 2007;178: 567–574.  
684 doi:10.1083/jcb.200702125
- 685 39. Hofmann TG, Möller A, Sirma H, Zentgraf H, Taya Y, Dröge W, et al. Regulation of p53  
686 activity by its interaction with homeodomain-interacting protein kinase-2. *Nat Cell Biol.*  
687 2002;4: 1–10. doi:10.1038/ncb715
- 688 40. Li X, Zhang R, Luo D, Park S-J, Wang Q, Kim Y, et al. Tumor necrosis factor alpha-  
689 induced desumoylation and cytoplasmic translocation of homeodomain-interacting protein  
690 kinase 1 are critical for apoptosis signal-regulating kinase 1-JNK/p38 activation. *J Biol*  
691 *Chem.* 2005;280: 15061–70. doi:10.1074/jbc.M414262200



- 692 41. Gavrieli Y, Sherman Y, Ben-Sasson SA. Identification of programmed cell death in situ  
693 via specific labeling of nuclear DNA fragmentation. *J Cell Biol.* 1992;119: 493–501.  
694 doi:10.1083/jcb.119.3.493
- 695 42. Pagliarini RA, Xu T. A genetic screen in *Drosophila* for metastatic behavior. *Science.*  
696 2003;302: 1227–31. doi:10.1126/science.1088474
- 697 43. Busturia A, Morata G. Ectopic expression of homeotic genes caused by the elimination of  
698 the Polycomb gene in *Drosophila* imaginal epidermis. *Development.* 1988;104: 713–20.
- 699 44. Beuchle D, Struhl G, Müller J. Polycomb group proteins and heritable silencing of  
700 *Drosophila* Hox genes. *Development.* 2001;128: 993–1004.
- 701 45. Lewis EB. A gene complex controlling segmentation in *Drosophila*. *Nature.* 1978;276:  
702 565–70. doi:10.1038/276565a0
- 703 46. Denell RE. Homoeosis in *drosophila*. II. A genetic analysis of polycomb. *Genetics.*  
704 1978;90: 277–289.
- 705 47. Hannah-Alava A. Developmental Genetics of the Posterior Legs in *Drosophila*  
706 *Melanogaster*. *Genetics.* 1958;43: 878–905.
- 707 48. Lindsley DL, Grell EH. Genetic variations of *Drosophila melanogaster*. Carnegie Institute  
708 of Washington Publication. 1968.
- 709 49. Simon J, Chiang A, Bender W. Ten different Polycomb group genes are required for  
710 spatial control of the *abdA* and *AbdB* homeotic products. *Development.* 1992;114: 493–  
711 505.
- 712 50. Zhu J, Ordway AJ, Weber L, Buddika K, Kumar JP. Polycomb group (PcG) proteins and

- 713 Pax6 cooperate to inhibit in vivo reprogramming of the developing *Drosophila* eye.  
714 Development. 2018;145. doi:10.1242/dev.160754
- 715 51. Gandille P, Narbonne-Reveau K, Boissonneau E, Randsholt N, Busson D, Pret A-M.  
716 Mutations in the polycomb group gene polyhomeotic lead to epithelial instability in both  
717 the ovary and wing imaginal disc in *Drosophila*. PLoS One. 2010;5: e13946.  
718 doi:10.1371/journal.pone.0013946
- 719 52. Sadasivam DA, Huang D-H. Maintenance of Tissue Pluripotency by Epigenetic Factors  
720 Acting at Multiple Levels. Schwartz YB, editor. PLOS Genet. 2016;12.  
721 doi:10.1371/journal.pgen.1005897
- 722 53. Kim YH, Choi CY, Lee SJ, Conti MA, Kim Y. Homeodomain-interacting protein kinases,  
723 a novel family of co-repressors for homeodomain transcription factors. J Biol Chem.  
724 1998;273: 25875–9. doi:10.1074/jbc.273.40.25875
- 725 54. Kim EA, Noh YT, Ryu M-J, Kim H-T, Lee S-E, Kim C-H, et al. Phosphorylation and  
726 transactivation of Pax6 by homeodomain-interacting protein kinase 2. J Biol Chem.  
727 2006;281: 7489–97. doi:10.1074/jbc.M507227200
- 728 55. Steinmetz EL, Dewald DN, Walldorf U. Homeodomain-interacting protein kinase  
729 phosphorylates the *Drosophila* Paired box protein 6 (Pax6) homologues Twin of eyeless  
730 and Eyeless. Insect Mol Biol. 2018;27: 198–211. doi:10.1111/imb.12363
- 731 56. Kassis JA, Kennison JA, Tamkun JW. Polycomb and Trithorax Group Genes in  
732 *Drosophila*. Genetics. 2017;206: 1699–1725. doi:10.1534/genetics.115.185116
- 733 57. Roscic A, Möller A, Calzado MA, Renner F, Wimmer VC, Gresko E, et al.

- 734 Phosphorylation-Dependent Control of Pc2 SUMO E3 Ligase Activity by Its Substrate  
735 Protein HIPK2. *Mol Cell*. 2006. doi:10.1016/j.molcel.2006.08.004
- 736 58. Haas J, Bloesel D, Bacher S, Kracht M, Schmitz ML. Chromatin Targeting of HIPK2  
737 Leads to Acetylation-Dependent Chromatin Decondensation. *Front Cell Dev Biol*. 2020;8.  
738 doi:10.3389/fcell.2020.00852
- 739 59. Tettweiler G, Blaquiére JA, Wray NB, Verheyen EM. Hipk is required for JAK/STAT  
740 activity during development and tumorigenesis. *PLoS One*. 2019;14.  
741 doi:10.1371/journal.pone.0226856
- 742 60. Multiple Sequence Alignment Viewer [Internet]. Bethesda (MD): National Library of  
743 Medicine (US), National Center for Biotechnology Information; [cited 16 May 2020].  
744 Available: <https://www.ncbi.nlm.nih.gov/projects/msaviewer/>
- 745 61. Waterhouse AM, Procter JB, Martin DMA, Clamp M, Barton GJ. Jalview Version 2--a  
746 multiple sequence alignment editor and analysis workbench. *Bioinformatics*. 2009;25:  
747 1189–91. doi:10.1093/bioinformatics/btp033
- 748 62. Schindelin J, Arganda-Carreras I, Frise E, Kaynig V, Longair M, Pietzsch T, et al. Fiji: an  
749 open-source platform for biological-image analysis. *Nat Methods*. 2012;9: 676–82.  
750 doi:10.1038/nmeth.2019
- 751 63. Schindelin J, Rueden CT, Hiner MC, Eliceiri KW. The ImageJ ecosystem: An open  
752 platform for biomedical image analysis. *Mol Reprod Dev*. 2015;82: 518–29.  
753 doi:10.1002/mrd.22489
- 754 64. Schneider CA, Rasband WS, Eliceiri KW. NIH Image to ImageJ: 25 years of image

- 755 analysis. Nat Methods. 2012;9: 671–5. doi:10.1038/nmeth.2089
- 756 65. Bellen HJ, Levis RW, He Y, Carlson JW, Evans-Holm M, Bae E, et al. The Drosophila  
757 gene disruption project: Progress using transposons with distinctive site specificities.  
758 Genetics. 2011. doi:10.1534/genetics.111.126995
- 759
- 760
- 761

762 **Figure legends:**

763 **Fig 1. hHIPK1 and hHIPK2 rescue *dhipk* mutant lethality.**

764 (A) The four human HIPKs and the single dHipk protein amino acid sequences are each  
765 compared with hHIPK2, the most studied hHIPK, for amino acid identity and similarity. Dark  
766 blue indicates higher sequence similarity, while light blue indicates lower sequence similarity,  
767 and orange indicates lack of conservation between the protein and hHIPK2. Within each Hipk  
768 amino acid sequence, the kinase domain is the region of highest similarity when compared with  
769 hHIPK2. Less similarity is present in the N and C-terminal domains, where various interaction  
770 and regulatory domains exist, as reviewed by Rinaldo *et al.* (2008) and Schmitz *et al.* (2013). (B)  
771 The cross scheme used to generate *dhipk* mutant flies that expressed *UAS-hHIPKs* in the *dhipk*  
772 domain involved crossing two fly strains. A male fly homozygous for a *UAS-hHIPK* transgene  
773 on the 2<sup>nd</sup> chromosome and heterozygous for the *dhipk[4]* mutant on the 3<sup>rd</sup> chromosome over  
774 the balancer *TM6B* was crossed to a female fly with a wild-type 2<sup>nd</sup> chromosome and  
775 homozygous for *dhipk-Gal4* on the 3<sup>rd</sup> chromosome over the balancer *TM6C*. Resulting non-  
776 tubby progeny pupae were then scored for each cross. (C) The developmental stages were scored  
777 by assessing the pupal cases as described in the materials and methods. (D) Numbers at the top  
778 of the graph indicate the number of pupae scored per genotype. Flies were raised at the indicated  
779 temperatures with single-day egg lays. The furthest developmental stage of each pupae was  
780 recorded 5 days after control balancer flies eclosed and was plotted on the graph. Both male and  
781 female flies were combined for this experiment.

782

783

784 **Fig 2. hHIPKs variably rescue minor *dhipk* mutant head phenotypes.**

785 (A) Representative heads and eyes from *dhipk* mutant flies expressing individual *UAS-hHIPKs*  
786 or *UAS-dHipk* using the *dhipk-Gal4* driver. (B) Location of the organs on the top of the head that  
787 were quantified in this figure. (C) The surface area of 12 eyes (6 flies) were imaged and  
788 measured for each cross. (D-F) The ocelli, posterior ocellar bristles, and anterior ocellar bristles  
789 of 6 heads were counted after imaging. (C-F) Comparisons in each graph are made to the *dhipk*  
790 mutant (*dhipk* KO) result. “Control” flies are of the genotype *+/+* ; *dhipk-Gal4/+*. Error bars  
791 indicate the mean with a 95% confidence interval. A one-way ANOVA was performed followed  
792 by Dunnett’s test to correct for multiple comparisons for each dataset. P-values for the statistical  
793 analyses performed correspond to the following symbols:  $\geq 0.0332$  (ns),  $< 0.0332$  (\*),  
794  $< 0.0021$ (\*\*),  $< 0.0002$ (\*\*\*),  $< 0.0001$ (\*\*\*\*). (G) Summary table of *dhipk* mutant rescue  
795 phenotypes. Only female flies were assessed for this experiment.

796

797 **Fig 3. Effects of Hipk expression in wild-type *D. melanogaster* wings.**

798 (A) Representative adult wings dissected from the corresponding genotypes. (B) Graphical  
799 representation of the *dpp-Gal4* domain in larval wing disc and adult wing tissues. Green  
800 indicates the *dpp-Gal4* domain, while other colors and patterns indicate corresponding regions  
801 between the larval and adult wing. (C) Zoomed in image of *dpp-Gal4*, *UAS-hHIPK1* or *UAS-*  
802 *hHIPK2* wing notching phenotype, compared to a wild-type haltere (images are to scale). Inset  
803 boxes for each image focus on similar phenotypes between the three images. (D) Representative  
804 images of late 3<sup>rd</sup> instar imaginal wing discs dissected from larvae of the corresponding  
805 genotypes and stained for the Hox protein Ubx. Wing discs expressing *UAS-hHIPK1* or *UAS-*

806 *hHIPK2* show Ubx induction in the wing pouch (arrows). Results were consistent across 10 wing  
807 imaginal discs assessed for each genotype. (E) Representative images of late 3<sup>rd</sup> instar imaginal  
808 wing discs of the corresponding genotypes stained for mitotic marker PH3 and apoptosis marker  
809 TUNEL. (D, E) GFP marks the *dpp-Gal4* domain where *UAS* constructs are expressed. Scale  
810 bars are 50  $\mu$ m. (F-H) Graphs plotting the change in TUNEL staining, Area, and PH3 staining,  
811 respectively, caused by expression of *UAS-Hipk* constructs. Error bars indicate the mean with a  
812 95% confidence interval. A one-way ANOVA was performed followed by Dunnett's test to  
813 correct for multiple comparisons for each dataset. P-values for the statistical analyses performed  
814 correspond to the following symbols:  $\geq 0.0332$  (ns),  $< 0.0332$  (\*),  $< 0.0021$  (\*\*),  $< 0.0002$  (\*\*\*),  $<$   
815  $0.0001$  (\*\*\*\*). (I) Diagram explaining how changes in PH3 and TUNEL stains were quantified.  
816 For all images, the sex of the representative tissues was picked from mixed-sex samples unless  
817 otherwise noted by the female ( $\text{\textcircled{f}}$ ) symbol. Crosses were performed at 29°C.

818

819 **Fig 4. Effects of *Hipk* expression in wild-type *D. melanogaster* legs.**

820 (A) Adult legs dissected from the corresponding genotypes. Arrows indicate ectopic sex combs.  
821 (B) Graphical representation of the *dpp-Gal4* domain in larval leg imaginal disc and adult leg  
822 tissues. Green indicates the *dpp-Gal4* domain, while other colors indicate corresponding regions  
823 between the larval and adult leg. (C) Image of control late 3<sup>rd</sup> instar T<sub>1</sub> imaginal leg discs stained  
824 for the Hox protein Scr. (D) Representative images of late 3<sup>rd</sup> instar T<sub>2</sub> imaginal leg discs  
825 dissected from larvae of the corresponding genotypes and stained for the Hox protein Scr.  
826 Results were consistent across 10 T<sub>2</sub> imaginal leg discs assessed for each genotype. GFP marks  
827 the *dpp-Gal4* domain where *UAS* constructs are expressed. All adult and larval flies assessed in  
828 this figure were male. Crosses were performed at 29°C. (C, D) Scale bars: 50 $\mu$ m.

829

830 **Fig 5. hHIPK1 induces Hox protein AbdB in wing, leg, and eye imaginal discs.**

831 Representative 3<sup>rd</sup> instar imaginal (A) wing, (B) T<sub>2</sub> leg, and (C) eye-antennal discs are shown for  
832 each of the corresponding crosses. Ectopic Abd-B staining caused by hHIPK1 is shown with  
833 arrows. Sex of the representative tissues are mixed unless otherwise noted by the male (♂)  
834 symbol. Crosses were performed at 29°C. Scale bars: 50µm.

835

836 **Fig 6. Summary of phenotypes induced by fly and human Hipks.**

837 (A) Summary table of phenotypes observed when Hipks are expressed at 29°C in non-mutant  
838 flies. Blue indicates a detected change, while grey indicates no change. All results in the table  
839 were achieved using *dpp-Gal4* except for the larval eye-antennal imaginal disc size (area) result,  
840 which utilized *eyFLP*. (B) Summary figure highlighting the main findings of this paper. Grey  
841 background indicates results from the rescue experiment, while yellow background indicates  
842 results from *dpp-Gal4* expression in a wild-type background.

843

844 **S1 Fig. Schematic of *dhipk* mutant allele generation.** (A) The *dhipk[4]* allele was generated by  
845 P-element excision, as described previously [2]. (B) The *dhipk-Gal4* allele was generated in the  
846 Baylor genetrapp screen by insertion of a P-element containing a Gal4 exon into the beginning of  
847 the *dhipk* gene [65].

848 **S2 Fig. Validating *dhipk* knockout and *UAS-Hipk* expression using qPCR.** (A) The  
849 expression of *dhipk* was compared between wild-type, heterozygous *dhipk* mutant,



850 transheterozygous *dhipk* knockout, and *dhipk* knockouts expressing *UAS-Hipks*. (B) Expression  
851 of specific *hHIPKs* or *dhipk* was confirmed in the respective *dhipk* mutant rescue experiments  
852 using qPCR. For each *UAS-hHIPK* or *UAS-dhipk* rescue assessed, *dhipk* transheterozygous  
853 knockouts were used as the control. (A,B) Two male and two female 3<sup>rd</sup> instar larvae from each  
854 cross raised at 25°C were used in these experiments. Bars represent the mean, while error bars  
855 represent the upper and lower limits as defined by Quantstudio Design and Analysis Software.

856 **S3 Fig. Rescue of *dhipk* mutant patterning defects by *hHIPKs* at 18°C.** (A) The surface area  
857 of 12 eyes (6 flies) were imaged and measured for each cross. (B-D) The ocelli, posterior ocellar  
858 bristles, and anterior ocellar bristles of 6 heads were counted after imaging. (A-D) Comparisons  
859 in each graph are made to the *dhipk* mutant (*dhipk* KO) result. “Control” flies are of the genotype  
860 *+/+ ; dhipk-Gal4/+*. Error bars indicate the mean with a 95% confidence interval. A one-way  
861 ANOVA was performed followed by Dunnett’s test to correct for multiple comparisons for each  
862 dataset. P-values for the statistical analyses performed correspond to the following symbols:  
863  $\geq 0.0332$  (ns),  $< 0.0332$  (\*),  $< 0.0021$  (\*\*),  $< 0.0002$  (\*\*\*),  $< 0.0001$  (\*\*\*\*).

864 **S4 Fig. Wg protein is reduced at the D/V boundary where *UAS-hHIPK1* is expressed.** 3<sup>rd</sup>  
865 instar larval imaginal wing discs were stained as described in the materials and methods. Scale  
866 bars are 50µm. Flies were raised at 29°C.

867 **S5 Fig. Comparing the effects of *UAS-hHIPKs* and *UAS-dhipk* on eye-antennal disc size**  
868 **when expressed using *eyFLP*.** The *eyFLP* genetic construct causes strong *UAS* transgene  
869 expression within the entire eye-antennal disc. (A) Representative images of eye-antennal  
870 imaginal discs from each cross, with *w<sup>1118</sup>* used as the control. (B) Plotted data on the graph is  
871 from imaged eye-antennal discs with surface area measured using FIJI. Bars represent the mean,

872 while error bars represent the 95% confidence interval. Scale bars are 50 $\mu$ m. Flies were raised at  
873 29°C.

874 **S6 Fig. RNAi knockdown of PcG components phenocopies Hipk expression.** Fly stocks  
875 containing *UAS-RNAi* constructs expressed using *dpp-Gal4* causes homeotic transformation  
876 phenotypes similar to hHIPK1-3 expression (see Figs 3, 4, S7), and malformed legs similar to  
877 *dhipk* overexpression (see arrows). Flies were raised at 29°C..

878 **S7 Fig. Flies expressing *UAS-hHIPK1* in the eye-antennal disc do not develop aristae.** (A)  
879 Representative adult heads dissected from the corresponding genotypes. (B) Graphical  
880 representation of the *dpp-Gal4* domain in larval eye-antennal disc and adult head. Green  
881 indicates the *dpp-Gal4* domain, while other colors and patterns indicate corresponding regions  
882 between the larval and adult structures. Flies were raised at 29°C.

883 **S8 Fig. Container setup used to image adult flies in the *dhipk* mutant rescue experiments.**  
884 An 8-well Cultureslide was modified as described in the materials and methods to facilitate  
885 preparation of multiple samples for high-resolution imaging on a single slide.

886

887

888

889

890

891

892

893

894 **S1 Table. Hipks variably induce leg deformities and ectopic sex combs.**

| <u>Genotype</u>                                     | <u># Legs Assessed</u>                                          | <u>Deformed (by segment)</u>                                                                                                                                                                                                                 | <u>Sex Combs</u>                                                        |
|-----------------------------------------------------|-----------------------------------------------------------------|----------------------------------------------------------------------------------------------------------------------------------------------------------------------------------------------------------------------------------------------|-------------------------------------------------------------------------|
| <i>dpp-Gal4, UAS-GFP</i><br><i>w<sup>1118</sup></i> | T <sub>1</sub> : 7 / T <sub>2</sub> : 7 / T <sub>3</sub> : 7    | Fe: T <sub>1</sub> : 0% / T <sub>2</sub> : 0% / T <sub>3</sub> : 0%<br>Ti: T <sub>1</sub> : 0% / T <sub>2</sub> : 0% / T <sub>3</sub> : 0%<br>Ta: T <sub>1</sub> : 0% / T <sub>2</sub> : 0% / T <sub>3</sub> : 0%                            | T <sub>1</sub> : 100% / T <sub>2</sub> : 0% / T <sub>3</sub> : 0%       |
| <i>dpp-Gal4, UAS-GFP</i><br><i>UAS-dhipk</i>        | T <sub>1</sub> : 14 / T <sub>2</sub> : 14 / T <sub>3</sub> : 13 | Fe: T <sub>1</sub> : 100% / T <sub>2</sub> : 100% / T <sub>3</sub> : 100%<br>Ti: T <sub>1</sub> : 100% / T <sub>2</sub> : 100% / T <sub>3</sub> : 100%<br>Ta: T <sub>1</sub> : 0% / T <sub>2</sub> : 0% / T <sub>3</sub> : 0%                | T <sub>1</sub> : 100% / T <sub>2</sub> : 0% / T <sub>3</sub> : 0%       |
| <i>dpp-Gal4, UAS-GFP</i><br><i>UAS-hHIPK1</i>       | T <sub>1</sub> : 21 / T <sub>2</sub> : 17 / T <sub>3</sub> : 19 | Fe: T <sub>1</sub> : 0% / T <sub>2</sub> : 0% / T <sub>3</sub> : 0%<br>Ti: T <sub>1</sub> : 0% / T <sub>2</sub> : 0% / T <sub>3</sub> : 0%<br>Ta: T <sub>1</sub> : 0% / T <sub>2</sub> : 0% / T <sub>3</sub> : 0%                            | T <sub>1</sub> : 100% / T <sub>2</sub> : 88.2% / T <sub>3</sub> : 78.9% |
| <i>dpp-Gal4, UAS-GFP</i><br><i>UAS-hHIPK2</i>       | T <sub>1</sub> : 19 / T <sub>2</sub> : 19 / T <sub>3</sub> : 18 | Fe: T <sub>1</sub> : 80.0% / T <sub>2</sub> : 86.7% / T <sub>3</sub> : 94.4%<br>Ti: T <sub>1</sub> : 80.0% / T <sub>2</sub> : 73.3% / T <sub>3</sub> : 88.9%<br>Ta: T <sub>1</sub> : 20.0% / T <sub>2</sub> : 20.0% / T <sub>3</sub> : 38.9% | T <sub>1</sub> : 100% / T <sub>2</sub> : 0% / T <sub>3</sub> : 0%       |
| <i>dpp-Gal4, UAS-GFP</i><br><i>UAS-hHIPK3</i>       | T <sub>1</sub> : 15 / T <sub>2</sub> : 15 / T <sub>3</sub> : 18 | Fe: T <sub>1</sub> : 80.0% / T <sub>2</sub> : 86.7% / T <sub>3</sub> : 94.4%<br>Ti: T <sub>1</sub> : 80.0% / T <sub>2</sub> : 73.3% / T <sub>3</sub> : 88.9%<br>Ta: T <sub>1</sub> : 20.0% / T <sub>2</sub> : 20.0% / T <sub>3</sub> : 38.9% | T <sub>1</sub> : 100% / T <sub>2</sub> : 80.0% / T <sub>3</sub> : 44.4% |
| <i>dpp-Gal4, UAS-GFP</i><br><i>UAS-hHIPK4</i>       | T <sub>1</sub> : 19 / T <sub>2</sub> : 19 / T <sub>3</sub> : 18 | Fe: T <sub>1</sub> : 0% / T <sub>2</sub> : 0% / T <sub>3</sub> : 0%<br>Ti: T <sub>1</sub> : 0% / T <sub>2</sub> : 0% / T <sub>3</sub> : 0%<br>Ta: T <sub>1</sub> : 0% / T <sub>2</sub> : 0% / T <sub>3</sub> : 0%                            | T <sub>1</sub> : 100% / T <sub>2</sub> : 0% / T <sub>3</sub> : 0%       |

895 Representative flies are shown in Fig 4A. Front legs are listed as T<sub>1</sub>, middle legs as T<sub>2</sub>, rear legs  
896 as T<sub>3</sub>. The penetrance of leg deformities for each genotype is separated by leg section, where Fe  
897 indicates the Femur, Ti indicates the Tibia, and Ta indicates the Tarsal segments, as indicated in  
898 Fig 4B. Both leg distortion and sex comb frequencies are listed for males only. Female legs are  
899 distorted, but frequencies are not listed here. No female legs from these genotypes display  
900 ectopic sex combs. Flies were raised at 29°C.

Fig 1

A

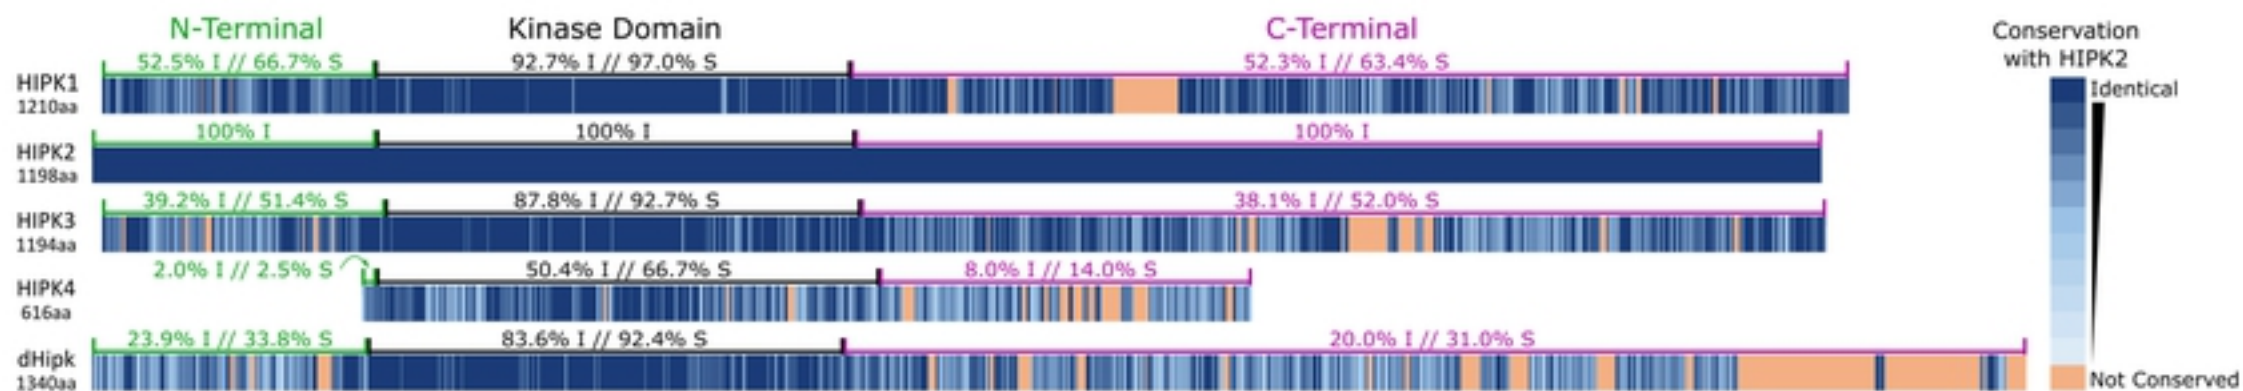

B

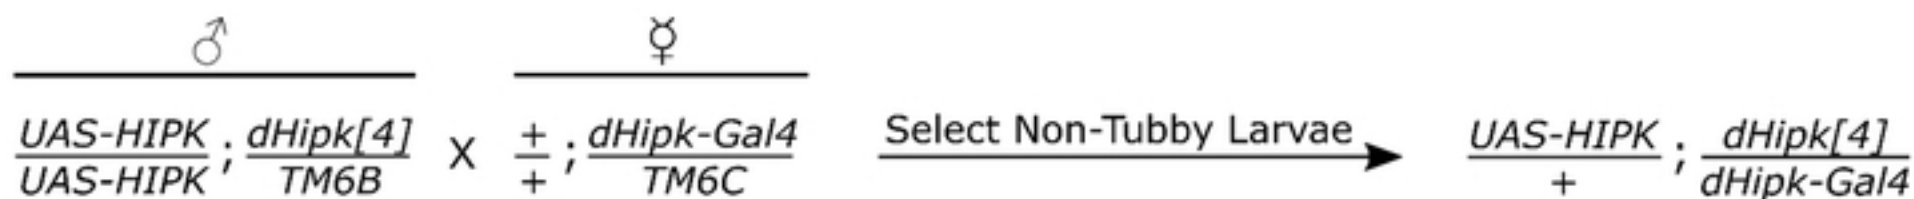

C

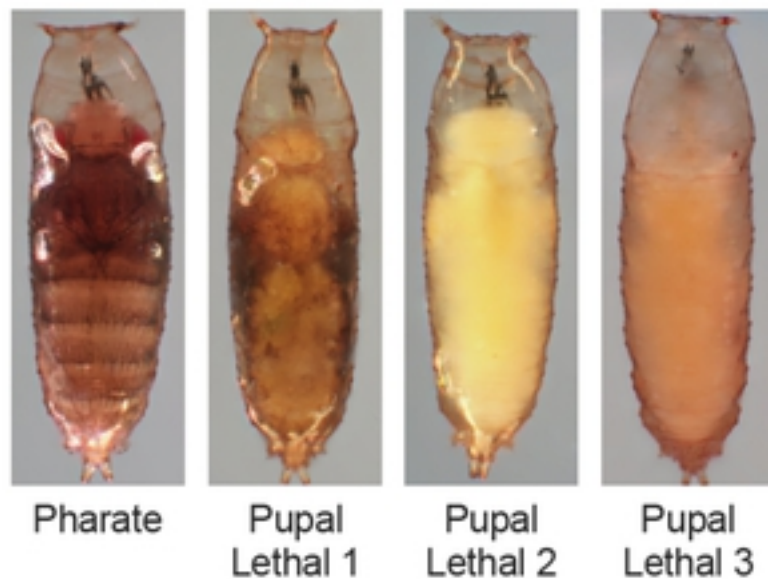

D

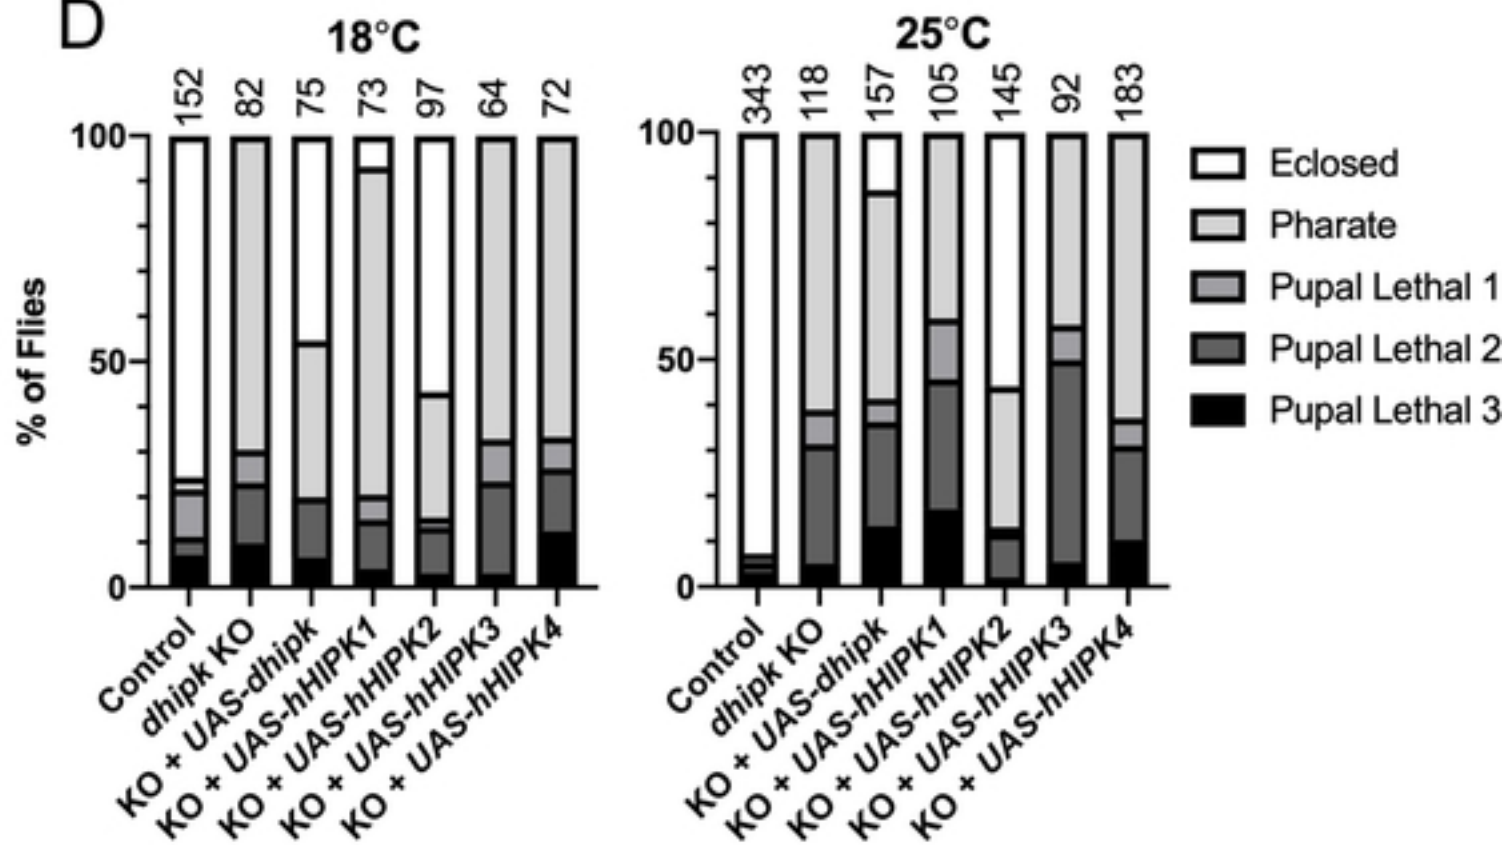

Fig 1



Fig 2

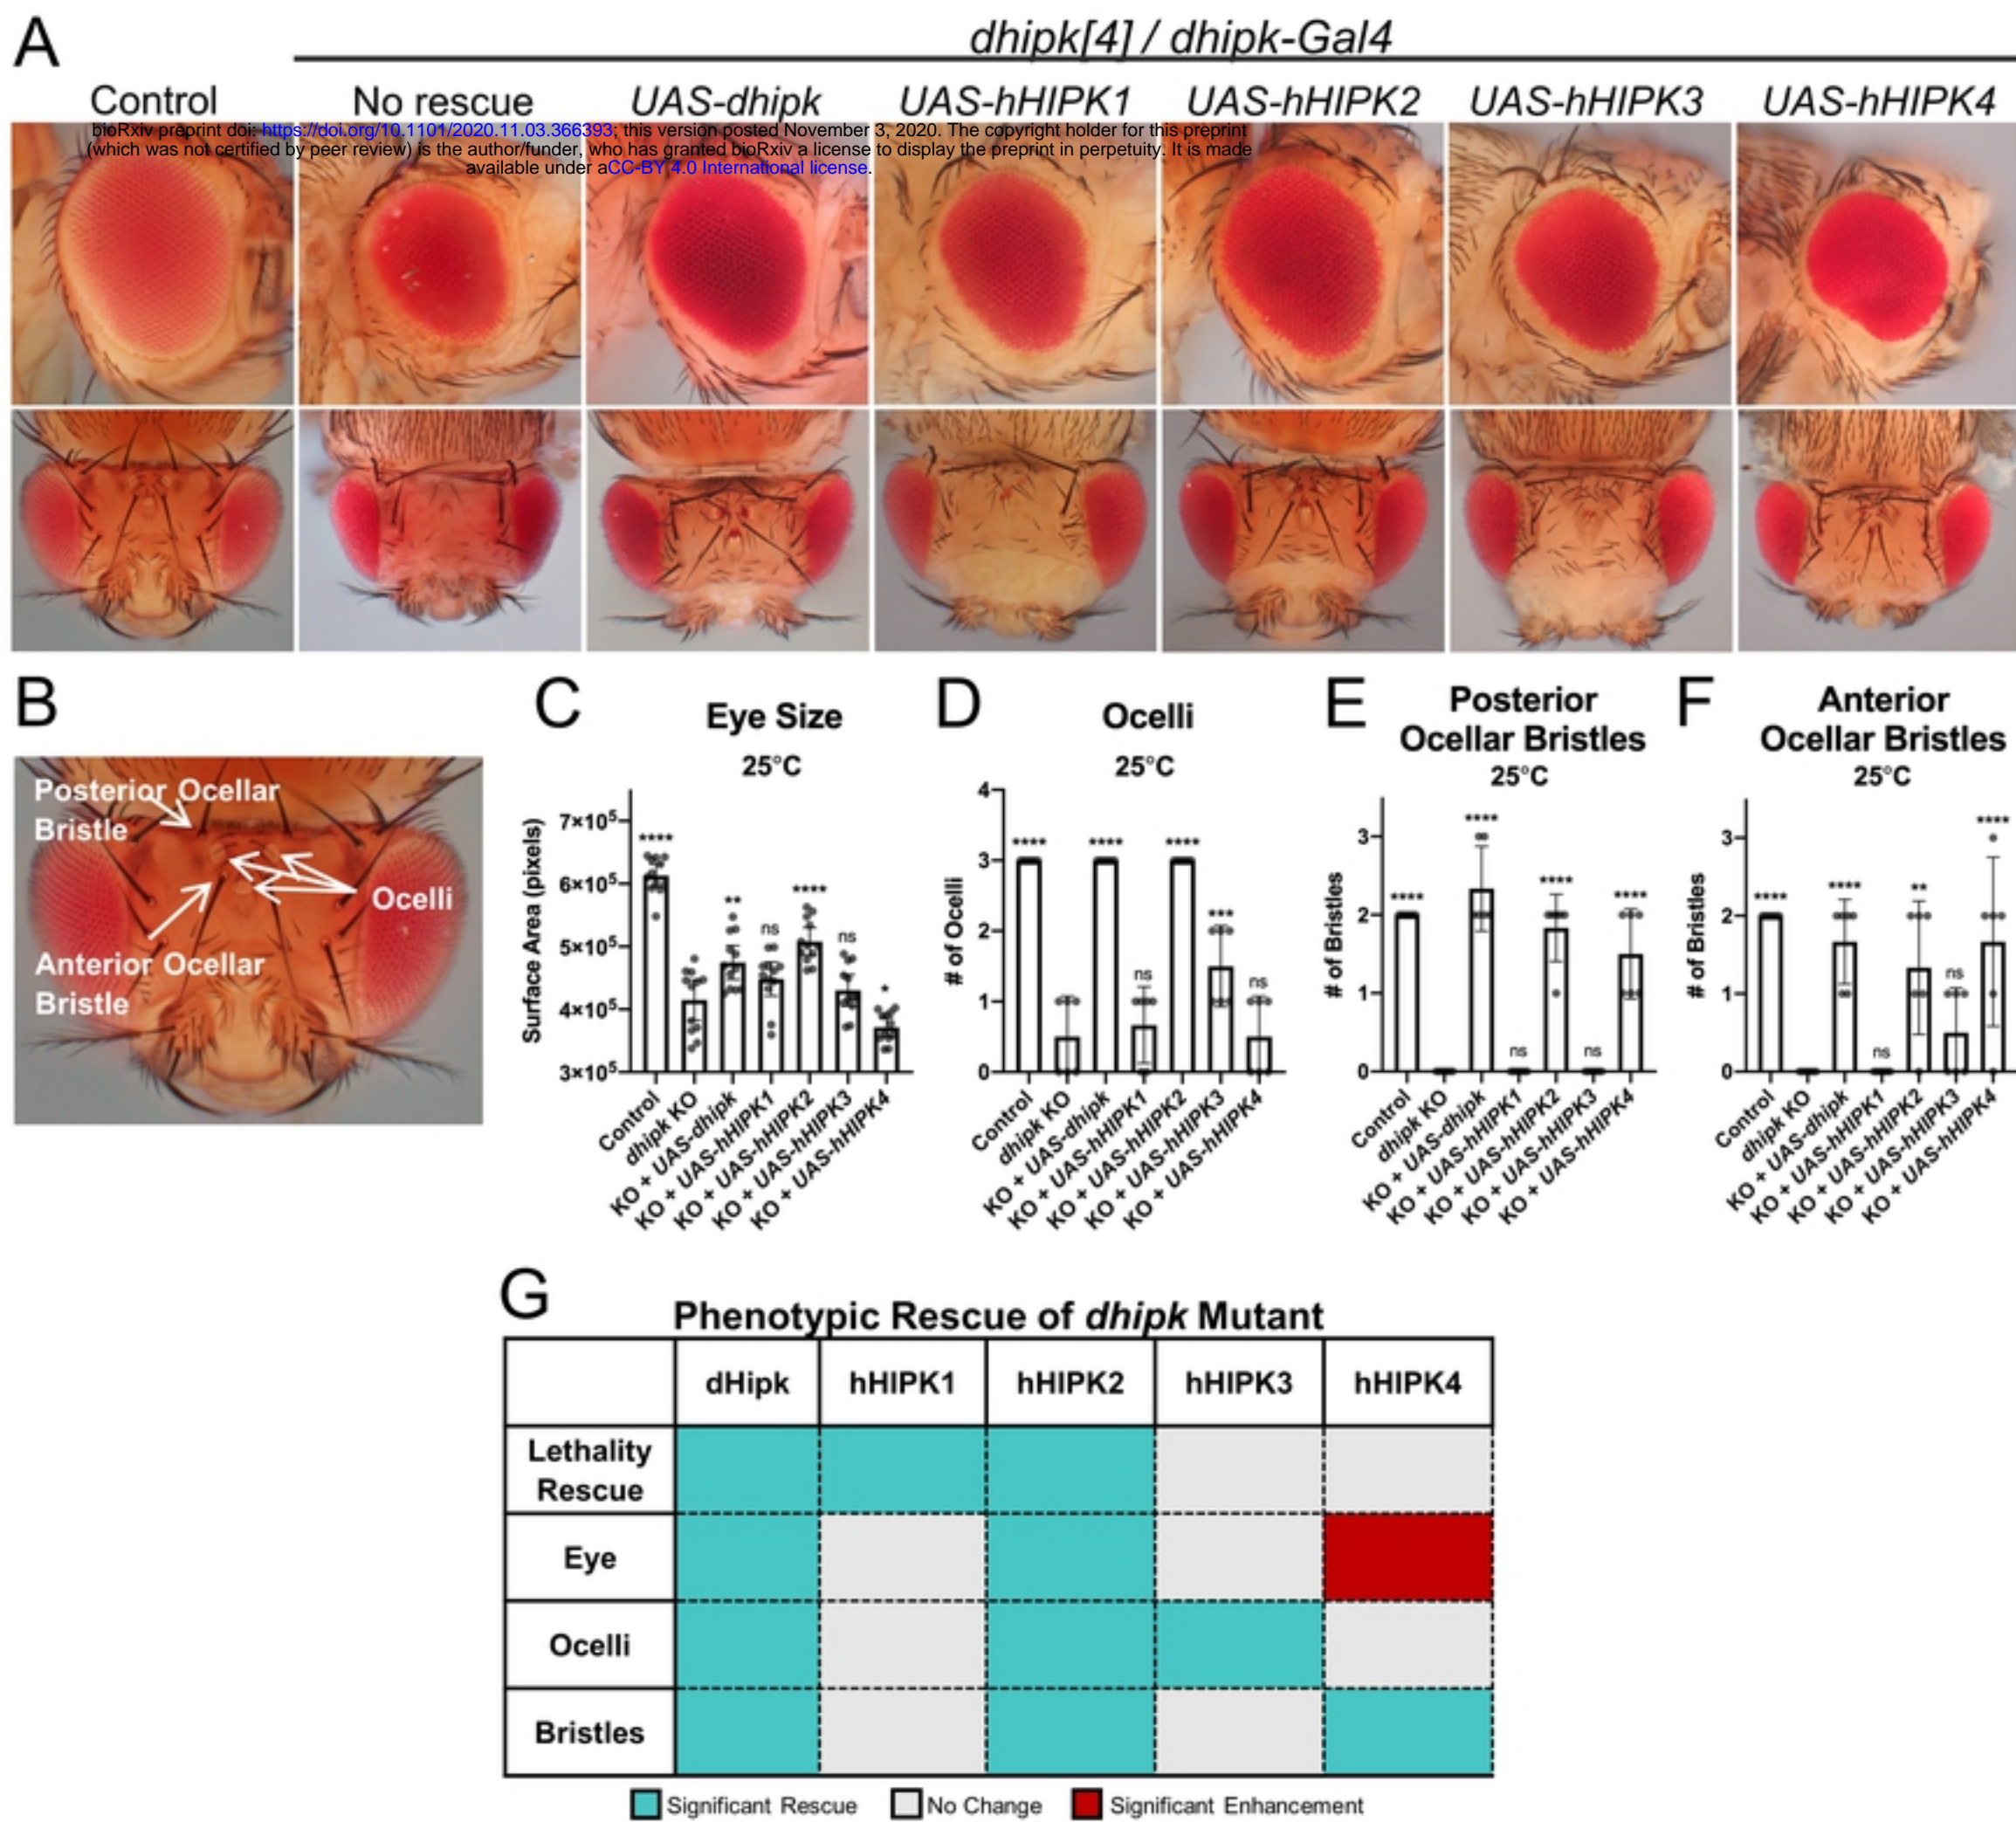

Fig 2



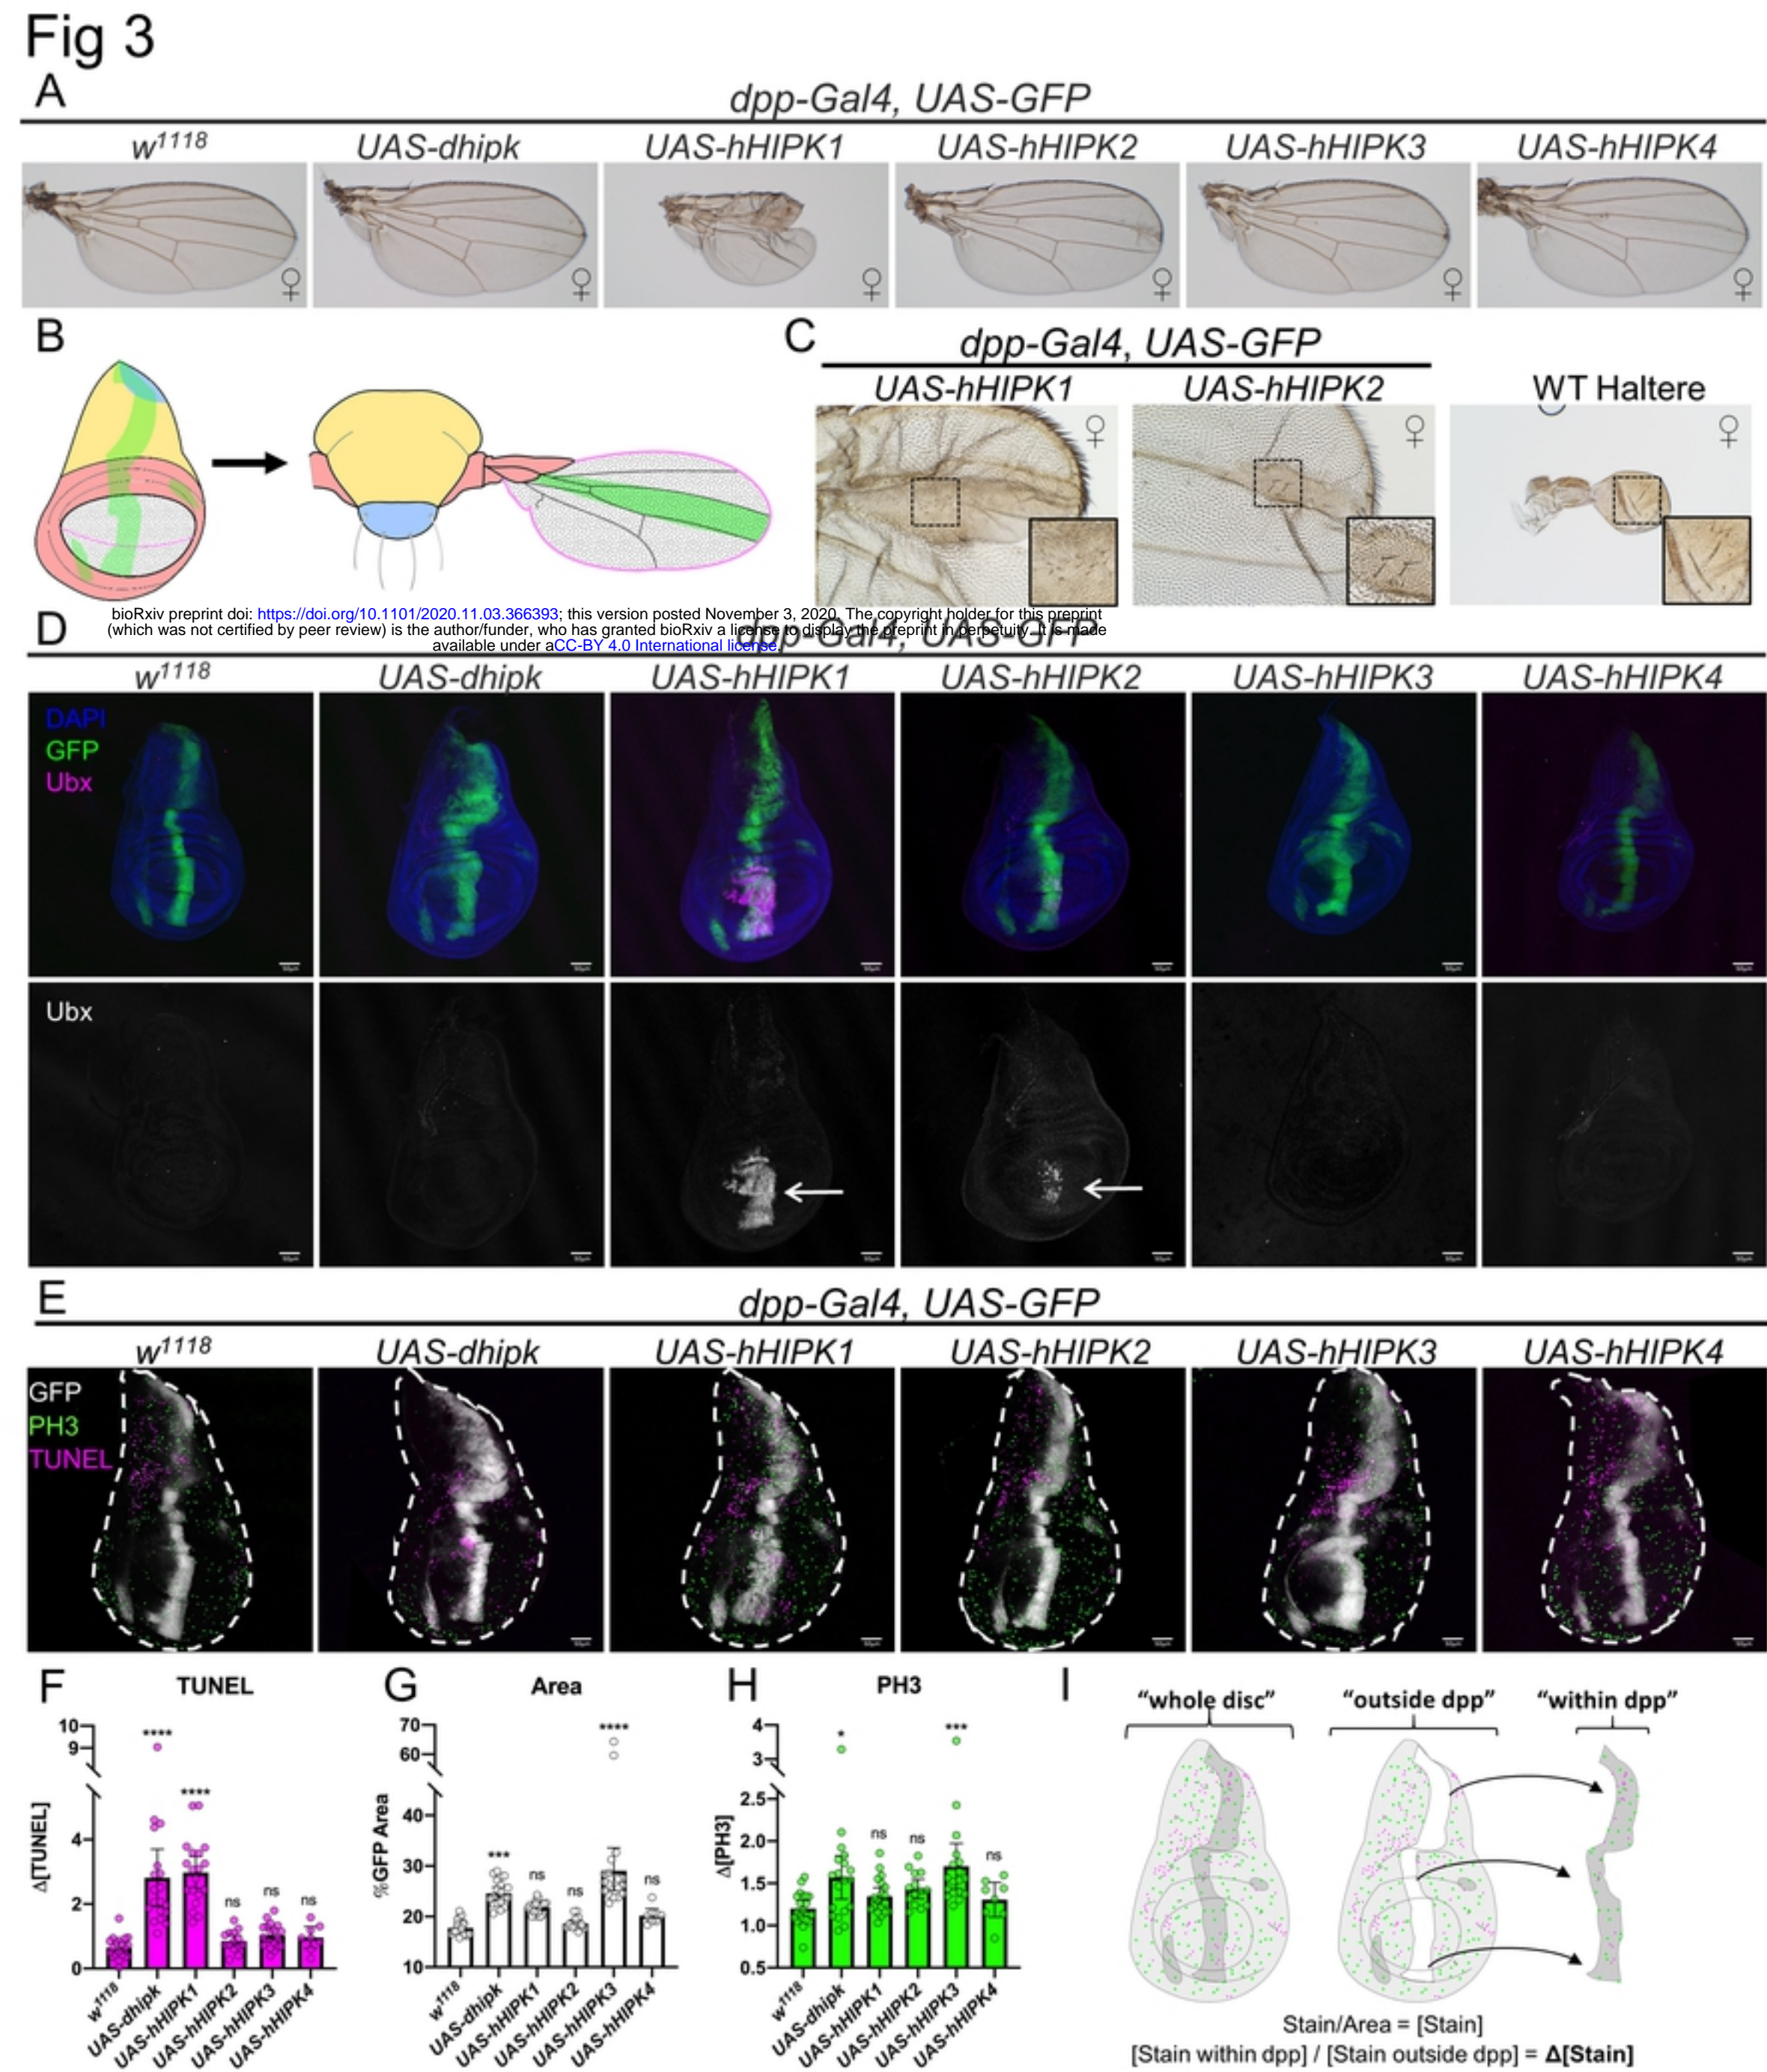

**Fig 3**



Fig 5

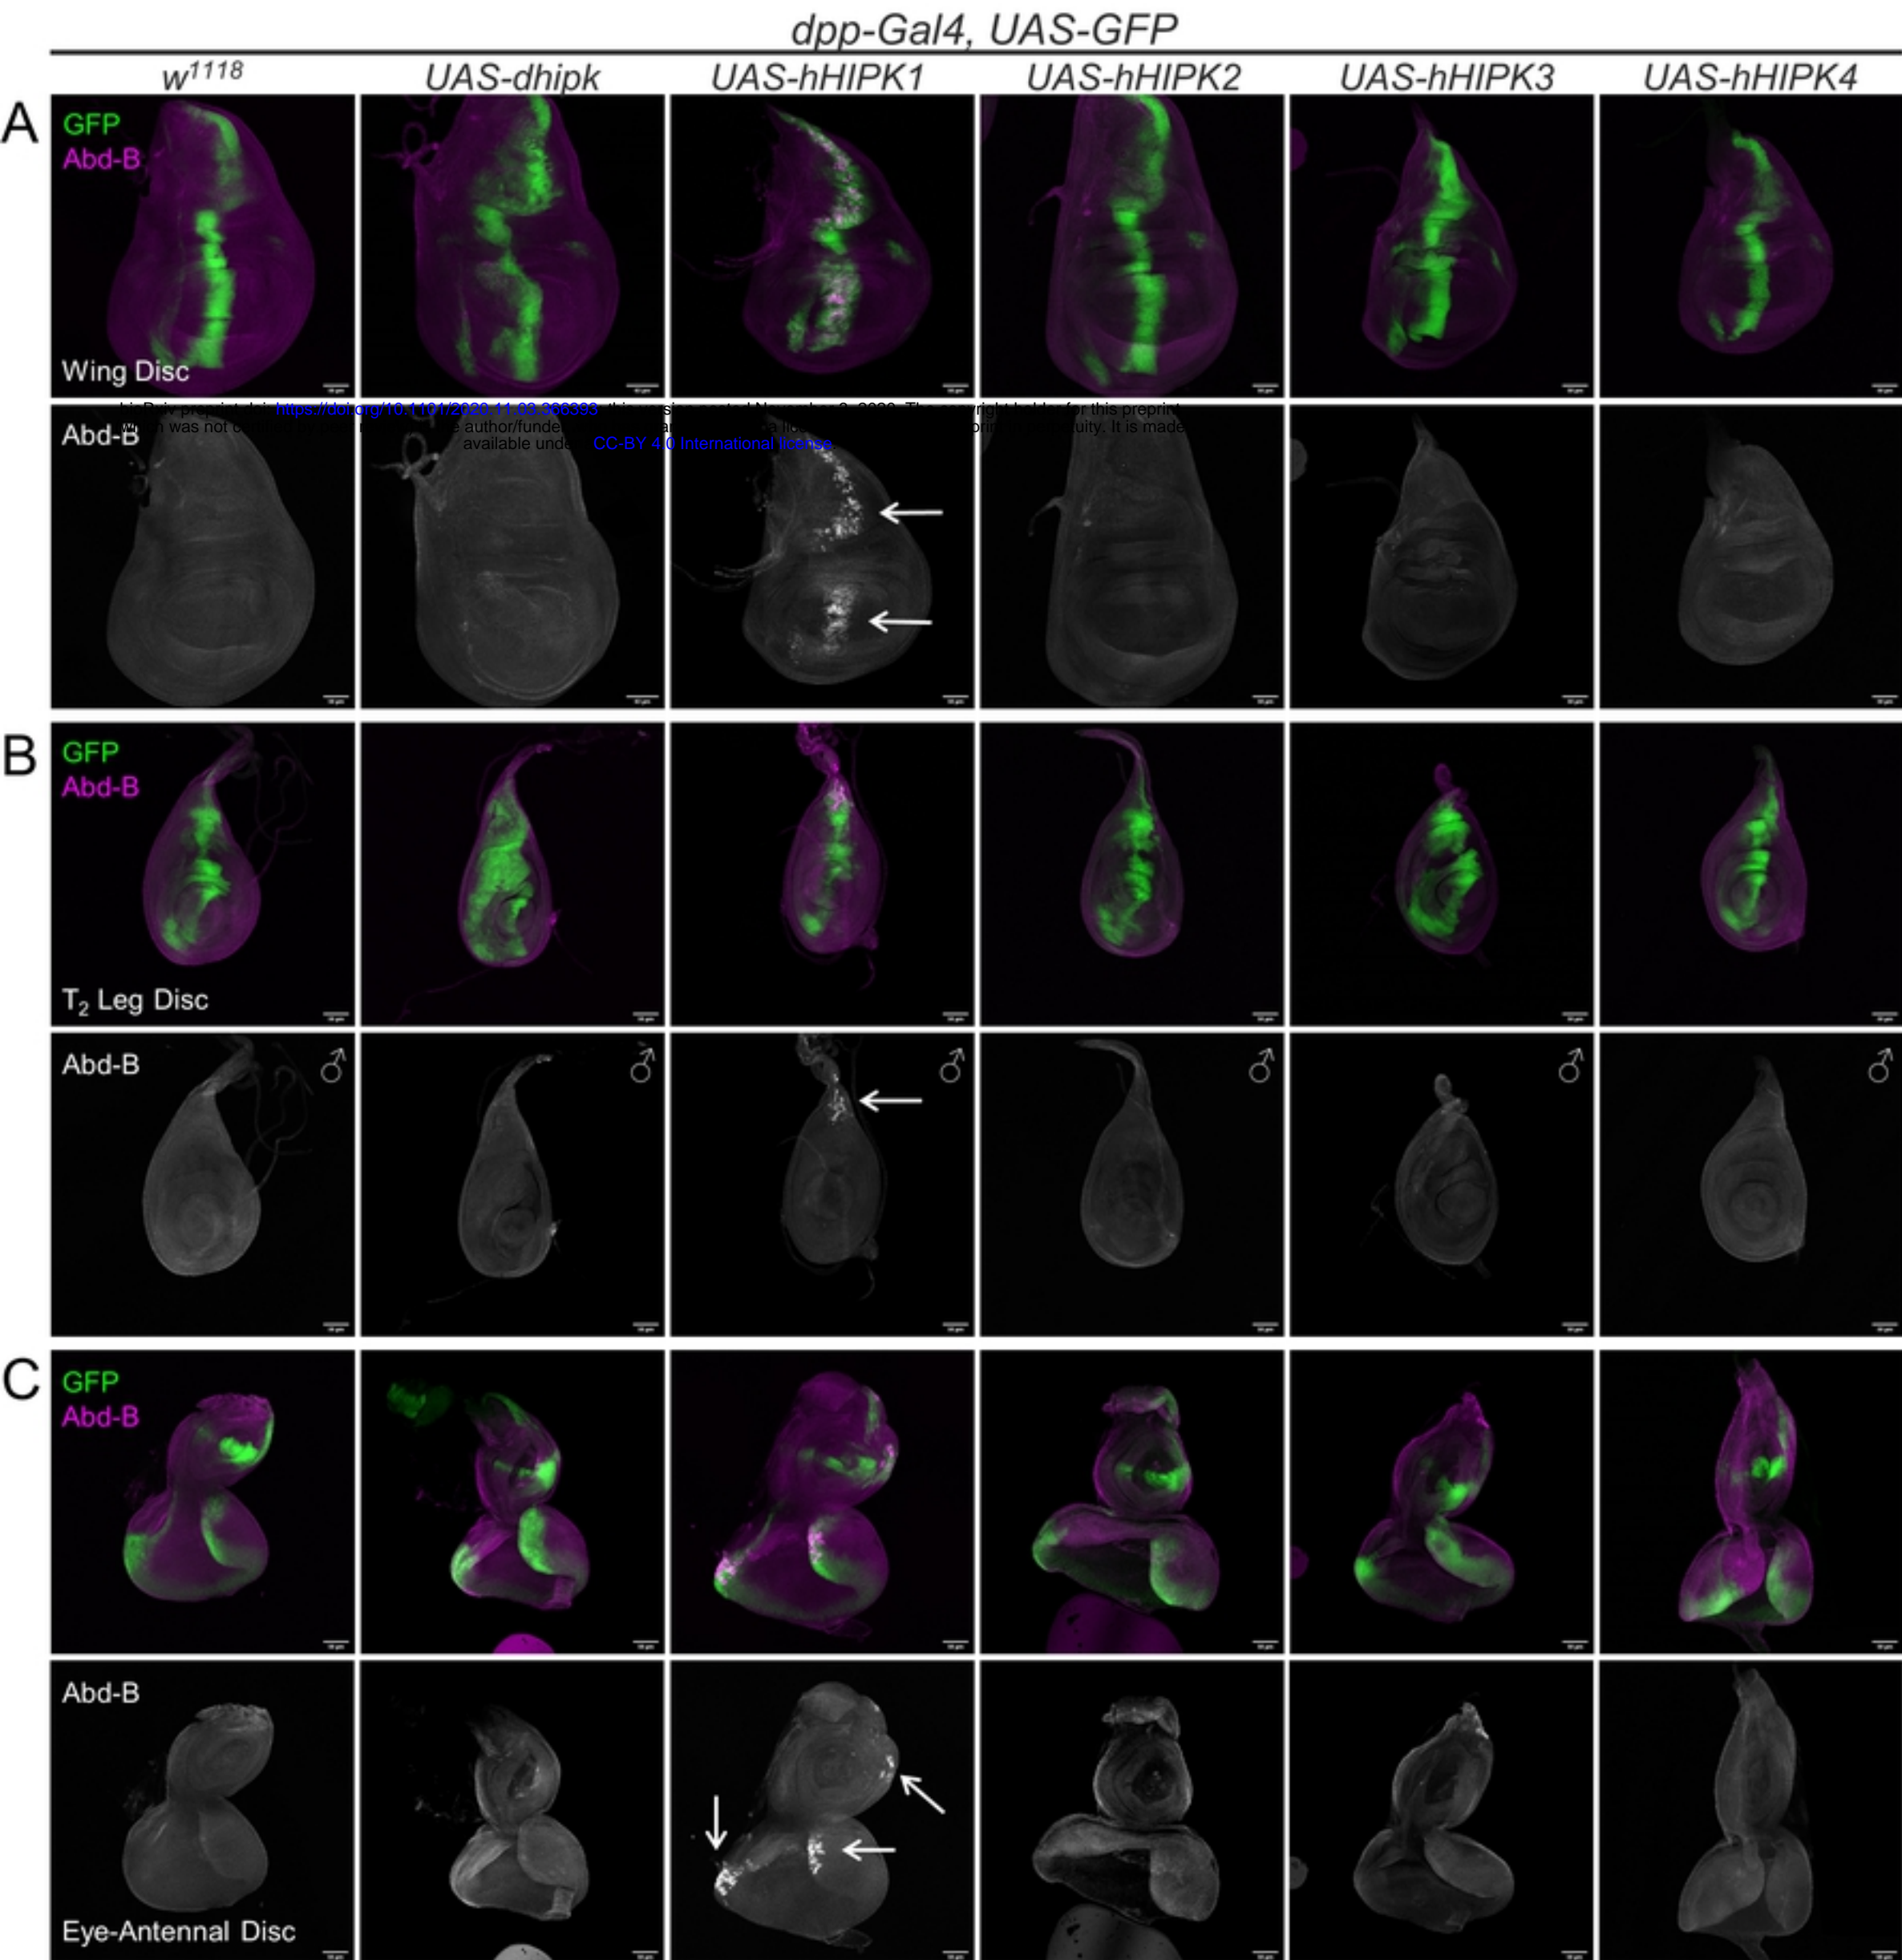

Fig 5

Fig 6

**Observed expression phenotypes in wild-type background**

| Tissue      | Phenotype                                              | Observed expression phenotypes in wild-type background |                   |                   |                   |                   |
|-------------|--------------------------------------------------------|--------------------------------------------------------|-------------------|-------------------|-------------------|-------------------|
|             |                                                        | <i>UAS-dhipk</i>                                       | <i>UAS-hHIPK1</i> | <i>UAS-hHIPK2</i> | <i>UAS-hHIPK3</i> | <i>UAS-hHIPK4</i> |
| <b>Wing</b> | Adult Wing-to-Halterer Transformation                  |                                                        |                   |                   |                   |                   |
|             | Larval Ectopic Ubx                                     |                                                        |                   |                   |                   |                   |
|             | ↑Larval dpp Area                                       |                                                        |                   |                   |                   |                   |
|             | ↑Larval dpp PH3                                        |                                                        |                   |                   |                   |                   |
|             | ↑Larval dpp TUNEL                                      |                                                        |                   |                   |                   |                   |
| <b>Leg</b>  | Adult 2 <sup>nd</sup> – 1 <sup>st</sup> Transformation |                                                        |                   |                   |                   |                   |
|             | Adult Overgrown / Malformed Tissue                     |                                                        |                   |                   |                   |                   |
| <b>Eye</b>  | Larval Ectopic Scr in T <sub>2</sub> leg               |                                                        |                   |                   |                   |                   |
|             | Adult Antenna-to-Leg Transformation                    |                                                        |                   |                   |                   |                   |
|             | Larval Ectopic Antp                                    |                                                        |                   |                   |                   |                   |
| <b>All</b>  | ↑Larval Area ( <i>eyFLP</i> )                          |                                                        |                   |                   |                   |                   |
|             | Larval Ectopic Abd-B (Wing, Leg, and Eye discs)        |                                                        |                   |                   |                   |                   |

■ Present    ■ Absent

bioRxiv preprint doi: <https://doi.org/10.1101/2020.11.03.366393>; this version posted November 3, 2020. The copyright holder for this preprint (which was not certified by peer review) is the author/funder, who has granted bioRxiv a license to display the preprint in perpetuity. It is made available under aCC-BY 4.0 International license.

**B**

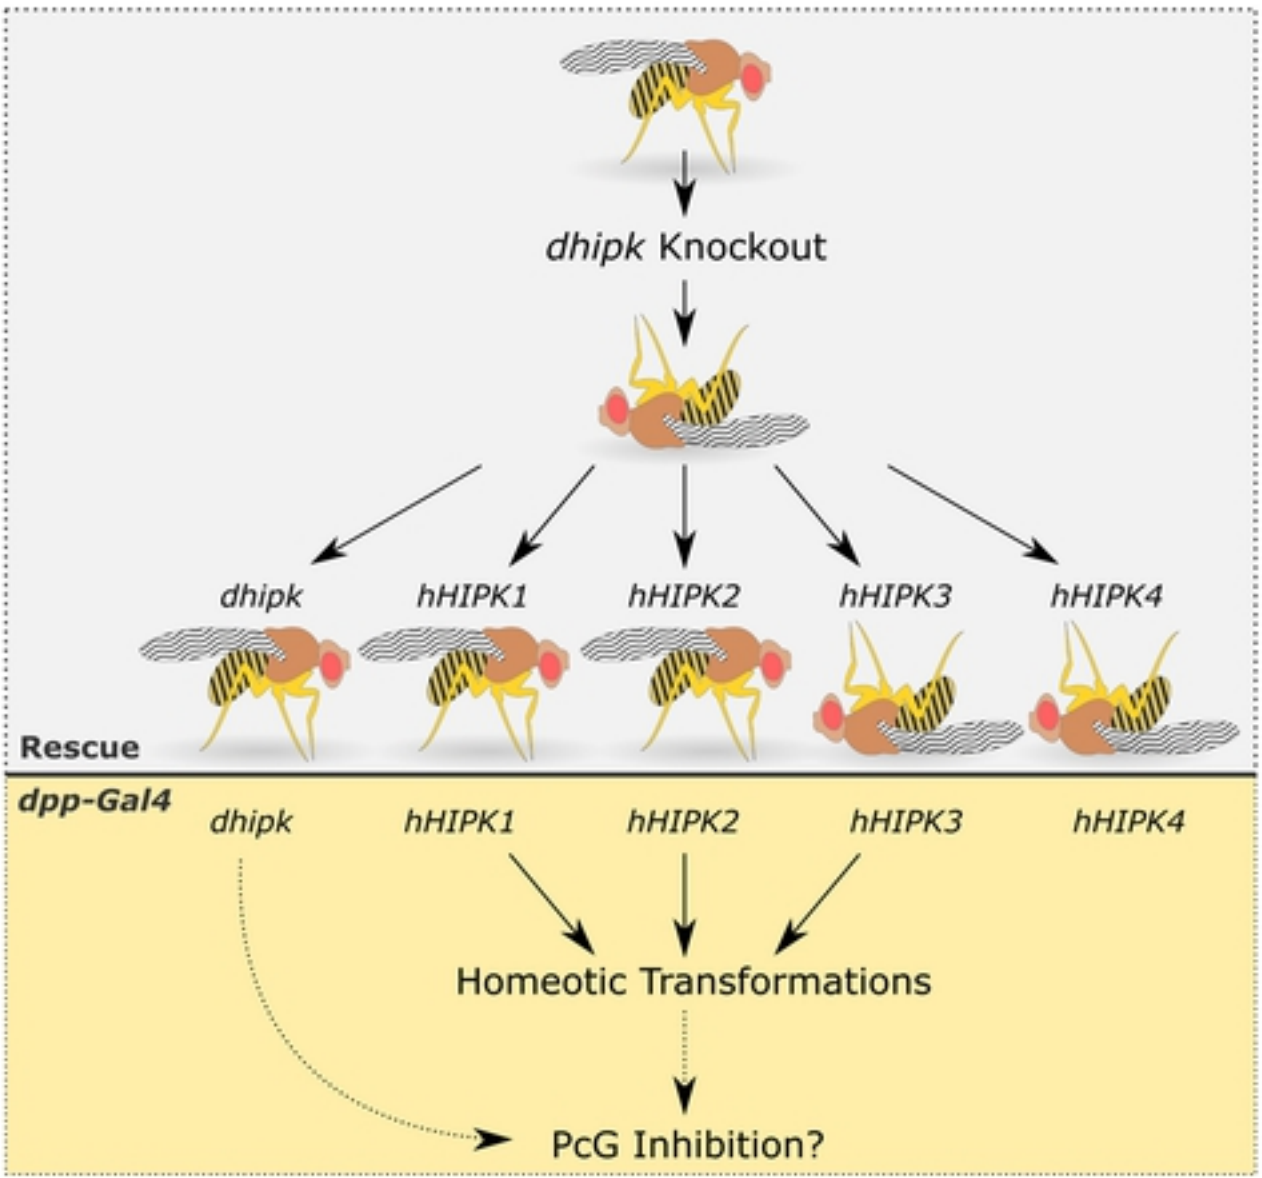

Fig 6



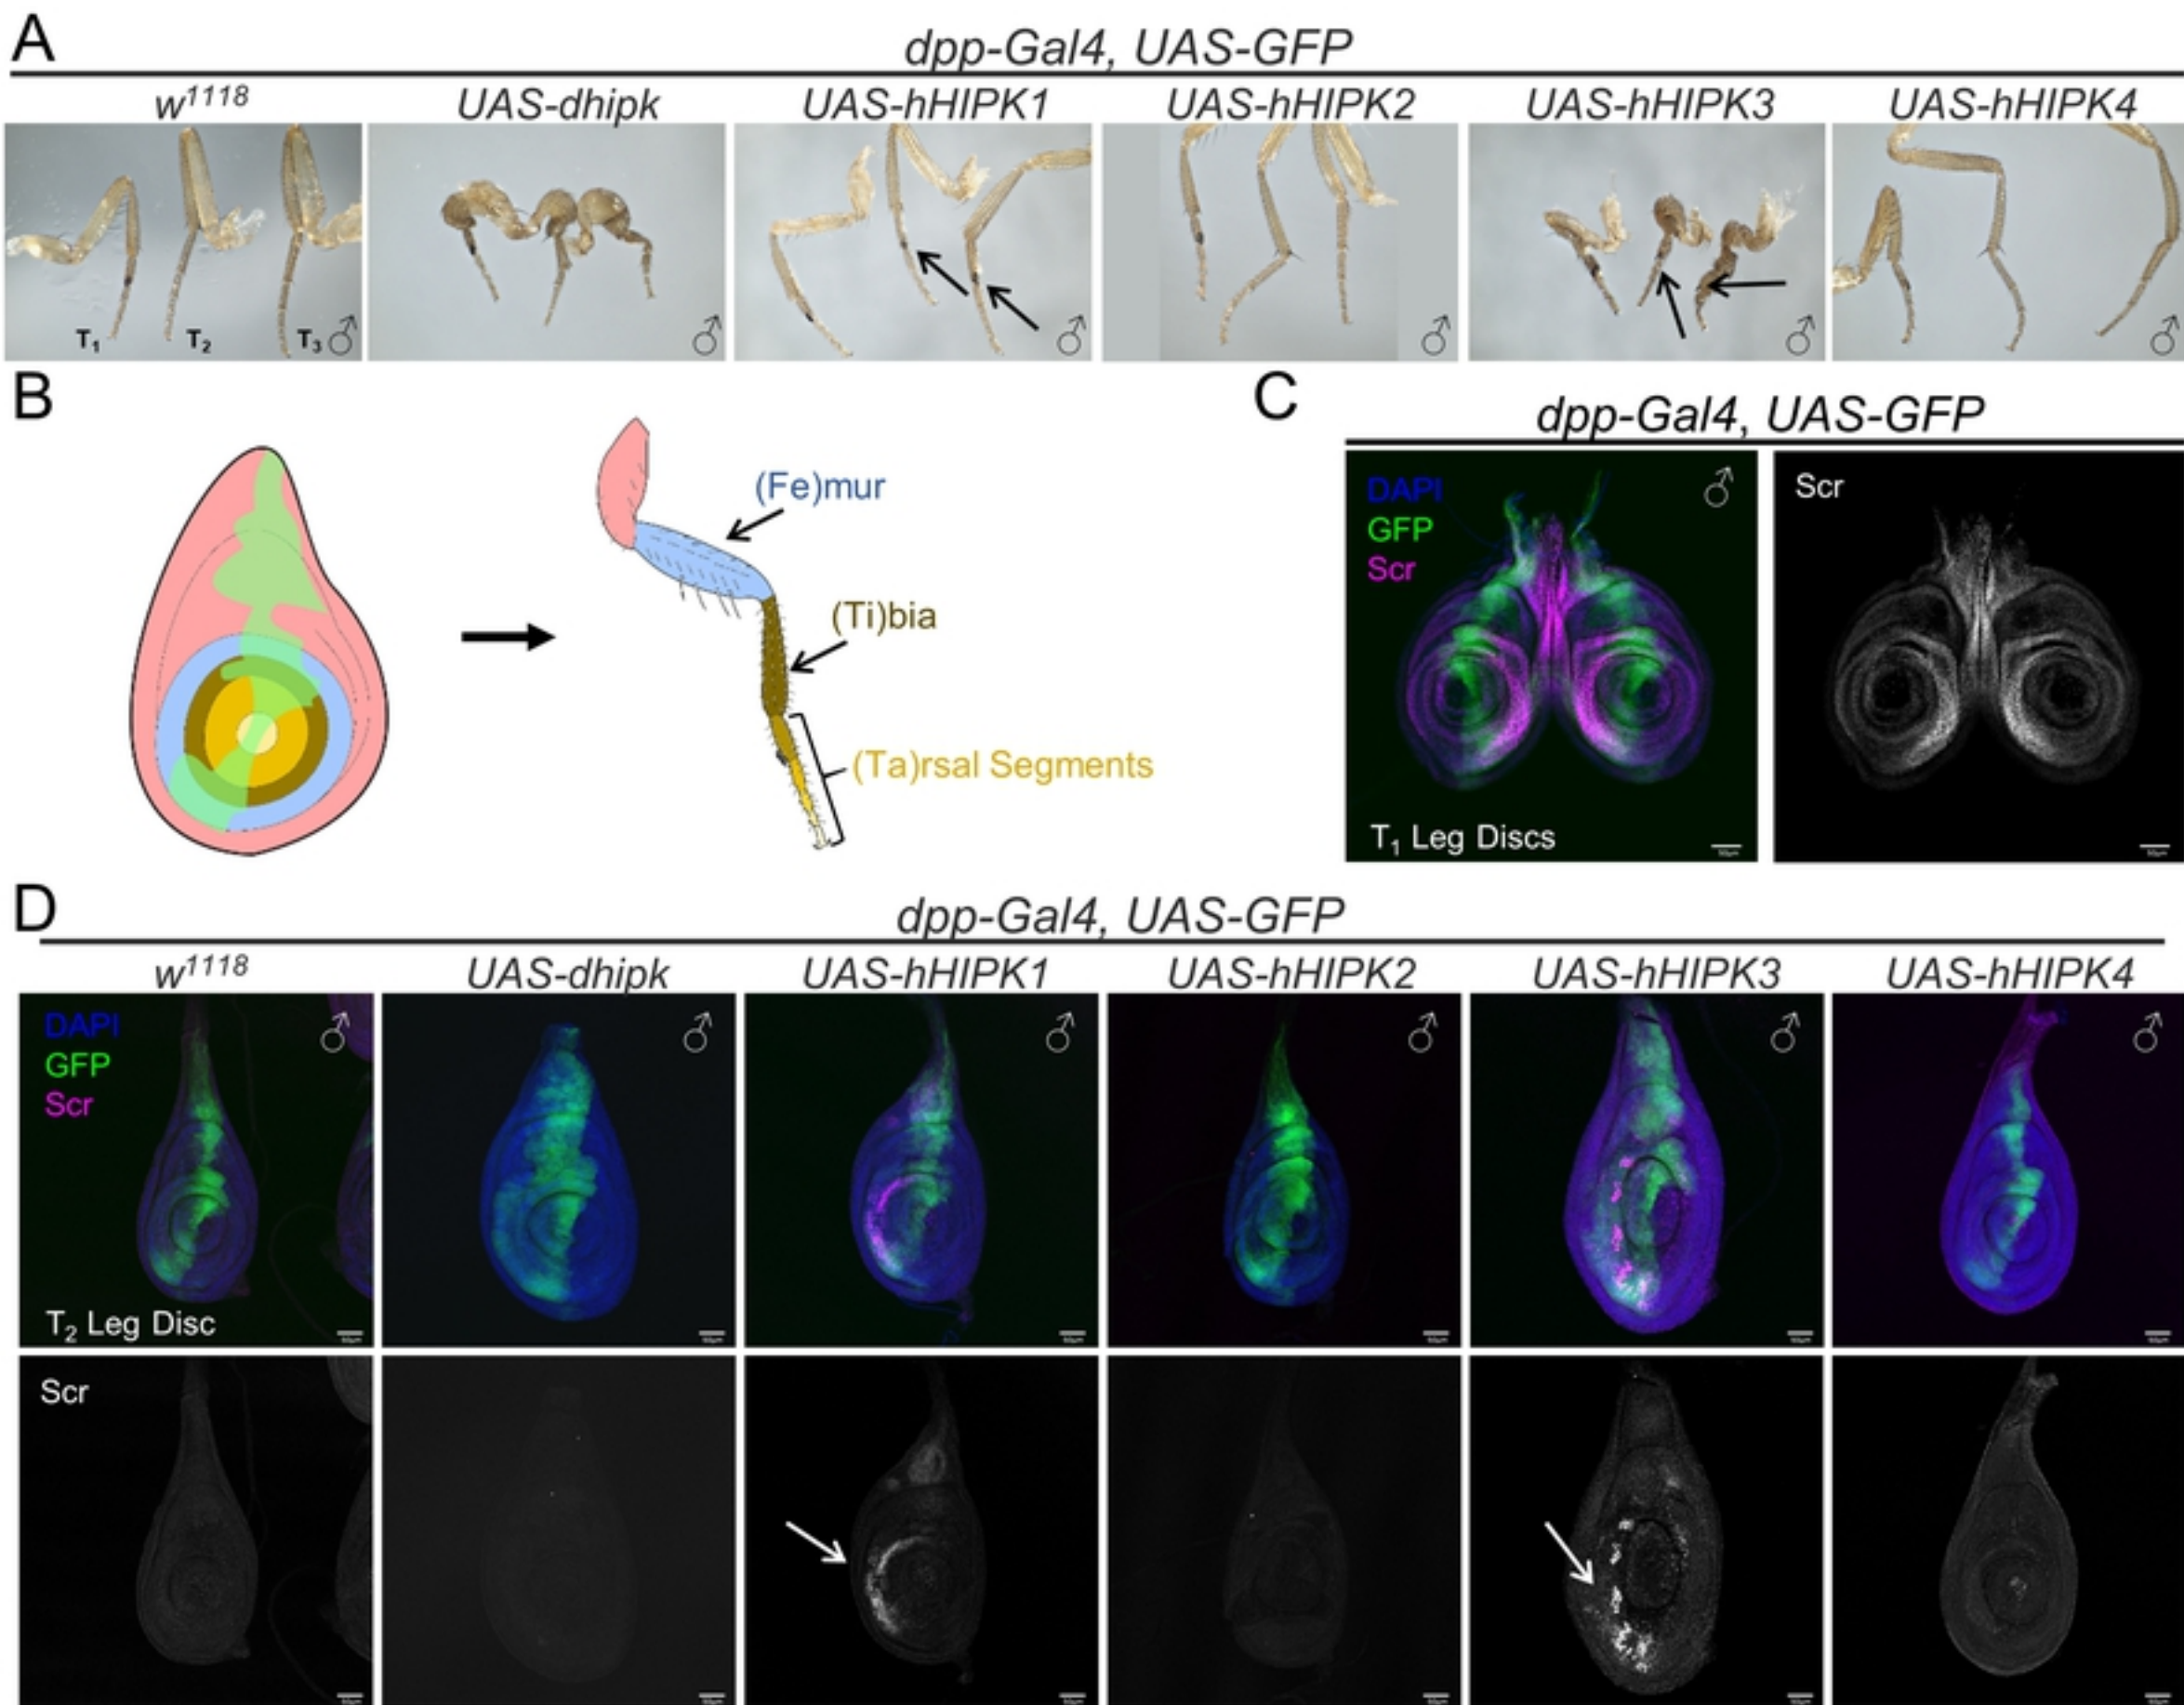

Fig 4
